# Supplementary material for: Differentially Expressed Genes and Signature Pathways of Human Prostate Cancer
Source: PLoS One. 2015 Dec 18;10(12):e0145322. doi: 10.1371/journal.pone.0145322 (PMC4687717; doi:10.1371/journal.pone.0145322)
Supplement: S6 Table — This is the full pathway overrepresentation analysis of protein class and GO Biological Process categories among DEGs from the dataset. (XLSX) [file pone.0145322.s009.xlsx]

## Sheet: Sheet1
PANTHER Overrepresentation Analysis
Analysis Type:	PANTHER Overrepresentation Test (release 20150430)						Analysis Type:	PANTHER Overrepresentation Test (release 20150430)
Annotation Version and Release Date:	PANTHER version 10.0 Released 2015-05-15						Annotation Version and Release Date:	PANTHER version 10.0 Released 2015-05-15
Analyzed List:	DEGs_DESeq2_q0,01_geneOnly.txt (Homo sapiens)						Analyzed List:	DEGs_DESeq2_q0,01_geneOnly.txt (Homo sapiens)
Reference List:	Homo sapiens (all genes in database)						Reference List:	Homo sapiens (all genes in database)
Bonferroni correction:	TRUE						Bonferroni correction:	TRUE
PANTHER Protein Class	Homo sapiens - REFLIST (20814)	DEGs_DESeq2_q0,01_geneOnly.txt (10447)	DEGs_DESeq2_q0,01_geneOnly.txt (expected)	DEGs_DESeq2_q0,01_geneOnly.txt (over/under)	DEGs_DESeq2_q0,01_geneOnly.txt (fold Enrichment)	DEGs_DESeq2_q0,01_geneOnly.txt (P-value)	PANTHER GO-Slim Biological Process	Homo sapiens - REFLIST (20814)	DEGs_DESeq2_q0,01_geneOnly.txt (10447)	DEGs_DESeq2_q0,01_geneOnly.txt (expected)	DEGs_DESeq2_q0,01_geneOnly.txt (over/under)	DEGs_DESeq2_q0,01_geneOnly.txt (fold Enrichment)	DEGs_DESeq2_q0,01_geneOnly.txt (P-value)
Unclassified	9675	4206	4856.09	-	0.87	0	Unclassified	8629	3623	4331.08	-	0.84	0
nucleic acid binding	2297	1332	1152.91	+	1.16	4.78e-06	metabolic process	8247	4772	4139.35	+	1.15	4.25e-34
RNA binding protein	859	535	431.15	+	1.24	9.08e-05	primary metabolic process	6825	3929	3425.62	+	1.15	4.05e-23
transferase	1245	741	624.89	+	1.19	0.000341	cellular process	6708	3740	3366.89	+	1.11	1.18e-12
ribosomal protein	225	165	112.93	+	1.46	0.000467	sensory perception of chemical stimulus	133	18	66.76	-	0.27	2.96e-10
hydrolase	1511	882	758.4	+	1.16	0.000575	protein metabolic process	2692	1581	1351.17	+	1.17	6.82e-09
transporter	1020	606	511.96	+	1.18	0.00365	developmental process	2456	1450	1232.72	+	1.18	1.48e-08
transcription factor	1565	888	785.51	+	1.13	0.0204	nucleobase-containing compound metabolic process	3467	1989	1740.16	+	1.14	1.64e-08
oxidoreductase	609	367	305.67	+	1.2	0.0601	RNA metabolic process	2360	1364	1184.54	+	1.15	6.87e-06
enzyme modulator	1346	761	675.59	+	1.13	0.091	cellular component organization or biogenesis	1316	796	660.53	+	1.21	1.49e-05
G-protein modulator	452	273	226.87	+	1.2	0.292	system development	1271	769	637.94	+	1.21	2.41e-05
oxidase	137	95	68.76	+	1.38	0.307	biological regulation	3918	2175	1966.53	+	1.11	3.03e-05
interferon superfamily	17	1	8.53	-	< 0.2	0.38	localization	2607	1470	1308.51	+	1.12	0.000313
extracellular matrix protein	380	232	190.73	+	1.22	0.385	transport	2473	1395	1241.25	+	1.12	0.000568
cytoskeletal protein	806	463	404.55	+	1.14	0.4	cellular component organization	1206	716	605.32	+	1.18	0.000758
kinase	514	304	257.99	+	1.18	0.515	nervous system development	823	503	413.08	+	1.22	0.00148
non-motor actin binding protein	190	123	95.37	+	1.29	0.726	cellular protein modification process	1317	771	661.03	+	1.17	0.0019
immunoglobulin receptor superfamily	197	73	98.88	-	0.74	0.772	translation	435	283	218.34	+	1.3	0.00281
calsequestrin	2	2	1	+	1.99	1	natural killer cell activation	99	23	49.69	-	0.46	0.00406
amino acid kinase	4	4	2.01	+	1.99	1	regulation of transcription from RNA polymerase II promoter	1319	765	662.03	+	1.16	0.00623
aldolase	1	1	0.5	+	1.99	1	transcription, DNA-dependent	1941	1095	974.23	+	1.12	0.00761
phosphatase activator	1	1	0.5	+	1.99	1	regulation of nucleobase-containing compound metabolic process	1700	967	853.27	+	1.13	0.00785
reverse transcriptase	1	1	0.5	+	1.99	1	anatomical structure morphogenesis	596	369	299.15	+	1.23	0.00908
hydroxylase	14	13	7.03	+	1.85	1	ectoderm development	663	405	332.77	+	1.22	0.0117
chaperonin	19	16	9.54	+	1.68	1	transcription from RNA polymerase II promoter	1723	976	864.81	+	1.13	0.0124
TGF-beta receptor	15	12	7.53	+	1.59	1	ion transport	714	431	358.37	+	1.2	0.0181
extracellular matrix linker protein	27	21	13.55	+	1.55	1	regulation of biological process	2846	1560	1428.47	+	1.09	0.0249
neurotrophic factor	9	7	4.52	+	1.55	1	cell communication	3006	1643	1508.78	+	1.09	0.0257
DNA methyltransferase	17	13	8.53	+	1.52	1	protein phosphorylation	603	367	302.66	+	1.21	0.0331
tyrosine protein kinase receptor	12	9	6.02	+	1.49	1	cellular component morphogenesis	478	297	239.92	+	1.24	0.0385
replication origin binding protein	8	6	4.02	+	1.49	1	regulation of molecular function	1096	633	550.11	+	1.15	0.045
intermediate filament binding protein	11	8	5.52	+	1.45	1	biological adhesion	606	367	304.16	+	1.21	0.0467
tubulin	22	16	11.04	+	1.45	1	cell adhesion	579	351	290.61	+	1.21	0.0592
DNA strand-pairing protein	7	5	3.51	+	1.42	1	mesoderm development	671	401	336.79	+	1.19	0.0649
cyclase	24	17	12.05	+	1.41	1	nitrogen compound metabolic process	1099	627	551.61	+	1.14	0.143
RNA methyltransferase	17	12	8.53	+	1.41	1	regulation of catalytic activity	1073	613	538.56	+	1.14	0.146
protein kinase receptor	33	23	16.56	+	1.39	1	spermatogenesis	172	118	86.33	+	1.37	0.147
mitochondrial carrier protein	58	40	29.11	+	1.37	1	lipid metabolic process	880	508	441.69	+	1.15	0.19
aminoacyl-tRNA synthetase	29	20	14.56	+	1.37	1	cell cycle	1107	627	555.63	+	1.13	0.264
serine/threonine protein kinase receptor	19	13	9.54	+	1.36	1	cellular amino acid metabolic process	264	169	132.51	+	1.28	0.267
carbohydrate kinase	30	20	15.06	+	1.33	1	phospholipid metabolic process	182	122	91.35	+	1.34	0.268
metalloprotease inhibitor	3	2	1.51	+	1.33	1	cellular component movement	476	287	238.91	+	1.2	0.269
DNA ligase	6	4	3.01	+	1.33	1	cell-cell adhesion	391	240	196.25	+	1.22	0.275
amino acid transporter	89	59	44.67	+	1.32	1	intracellular protein transport	1052	597	528.02	+	1.13	0.293
nucleotidyltransferase	68	45	34.13	+	1.32	1	phosphate-containing compound metabolic process	910	521	456.75	+	1.14	0.305
decarboxylase	26	17	13.05	+	1.3	1	synaptic transmission	331	206	166.14	+	1.24	0.317
methyltransferase	124	81	62.24	+	1.3	1	gamete generation	351	217	176.17	+	1.23	0.328
mRNA splicing factor	121	79	60.73	+	1.3	1	protein transport	1082	612	543.08	+	1.13	0.334
guanylate cyclase	20	13	10.04	+	1.3	1	vesicle-mediated transport	895	512	449.22	+	1.14	0.353
adenylate cyclase	20	13	10.04	+	1.3	1	cation transport	571	337	286.6	+	1.18	0.387
phosphodiesterase	37	24	18.57	+	1.29	1	cellular component biogenesis	310	193	155.6	+	1.24	0.429
endoribonuclease	45	29	22.59	+	1.28	1	rRNA metabolic process	115	81	57.72	+	1.4	0.472
lyase	154	99	77.3	+	1.28	1	embryo development	150	101	75.29	+	1.34	0.579
dehydratase	42	27	21.08	+	1.28	1	sensory perception of smell	30	5	15.06	-	0.33	0.59
deaminase	42	27	21.08	+	1.28	1	female gamete generation	96	69	48.18	+	1.43	0.6
ATP synthase	42	27	21.08	+	1.28	1	reproduction	410	246	205.79	+	1.2	0.71
guanyl-nucleotide exchange factor	169	108	84.82	+	1.27	1	biosynthetic process	764	437	383.47	+	1.14	0.745
cadherin	108	69	54.21	+	1.27	1	sulfur compound metabolic process	92	66	46.18	+	1.43	0.759
esterase	101	64	50.69	+	1.26	1	mRNA processing	274	170	137.53	+	1.24	0.858
Hsp70 family chaperone	19	12	9.54	+	1.26	1	cytokine production	4	4	2.01	+	1.99	1
phospholipase	59	37	29.61	+	1.25	1	cell recognition	1	1	0.5	+	1.99	1
mRNA processing factor	166	104	83.32	+	1.25	1	pinocytosis	1	1	0.5	+	1.99	1
exodeoxyribonuclease	8	5	4.02	+	1.25	1	bile acid metabolic process	1	1	0.5	+	1.99	1
endodeoxyribonuclease	16	10	8.03	+	1.25	1	disaccharide metabolic process	1	1	0.5	+	1.99	1
HMG box transcription factor	45	28	22.59	+	1.24	1	regulation of sequence-specific DNA binding transcription factor activity	15	13	7.53	+	1.73	1
membrane trafficking regulatory protein	119	74	59.73	+	1.24	1	sensory perception of pain	13	11	6.52	+	1.69	1
lipase	92	57	46.18	+	1.23	1	endoderm development	12	10	6.02	+	1.66	1
basic helix-loop-helix transcription factor	92	57	46.18	+	1.23	1	gluconeogenesis	14	11	7.03	+	1.57	1
extracellular matrix glycoprotein	126	78	63.24	+	1.23	1	ferredoxin metabolic process	8	6	4.02	+	1.49	1
mRNA polyadenylation factor	21	13	10.54	+	1.23	1	DNA catabolic process	4	3	2.01	+	1.49	1
damaged DNA-binding protein	21	13	10.54	+	1.23	1	mitochondrion organization	40	29	20.08	+	1.44	1
anion channel	21	13	10.54	+	1.23	1	mitochondrial transport	25	18	12.55	+	1.43	1
glucosidase	13	8	6.52	+	1.23	1	tRNA metabolic process	82	58	41.16	+	1.41	1
intermediate filament	83	51	41.66	+	1.22	1	porphyrin-containing compound metabolic process	27	19	13.55	+	1.4	1
epimerase/racemase	57	35	28.61	+	1.22	1	response to toxic substance	56	39	28.11	+	1.39	1
growth factor	137	84	68.76	+	1.22	1	regulation of cell cycle	26	18	13.05	+	1.38	1
transmembrane receptor regulatory/adaptor protein	72	44	36.14	+	1.22	1	asymmetric protein localization	13	9	6.52	+	1.38	1
ionotropic glutamate receptor	23	14	11.54	+	1.21	1	digestive tract mesoderm development	48	33	24.09	+	1.37	1
nuclear hormone receptor	46	28	23.09	+	1.21	1	amino acid transport	59	40	29.61	+	1.35	1
DNA-directed RNA polymerase	43	26	21.58	+	1.2	1	7-methylguanosine mRNA capping	3	2	1.51	+	1.33	1
antibacterial response protein	126	76	63.24	+	1.2	1	cell growth	3	2	1.51	+	1.33	1
dehydrogenase	253	152	126.99	+	1.2	1	regulation of carbohydrate metabolic process	21	14	10.54	+	1.33	1
non-receptor serine/threonine protein kinase	272	162	136.52	+	1.19	1	neuromuscular synaptic transmission	6	4	3.01	+	1.33	1
tight junction	37	22	18.57	+	1.18	1	polyphosphate catabolic process	3	2	1.51	+	1.33	1
acyltransferase	106	63	53.2	+	1.18	1	nucleobase-containing compound transport	116	77	58.22	+	1.32	1
small GTPase	133	79	66.76	+	1.18	1	cell-matrix adhesion	89	59	44.67	+	1.32	1
phosphatase	307	182	154.09	+	1.18	1	synaptic vesicle exocytosis	71	47	35.64	+	1.32	1
extracellular matrix structural protein	76	45	38.15	+	1.18	1	RNA catabolic process	56	37	28.11	+	1.32	1
translation initiation factor	66	39	33.13	+	1.18	1	RNA splicing	135	88	67.76	+	1.3	1
DNA-directed DNA polymerase	22	13	11.04	+	1.18	1	neurotransmitter secretion	145	94	72.78	+	1.29	1
cation transporter	207	122	103.9	+	1.17	1	protein lipidation	31	20	15.56	+	1.29	1
surfactant	56	33	28.11	+	1.17	1	RNA splicing, via transesterification reactions	132	85	66.25	+	1.28	1
ion channel	321	189	161.12	+	1.17	1	monosaccharide metabolic process	143	92	71.77	+	1.28	1
serine protease inhibitor	119	70	59.73	+	1.17	1	protein methylation	14	9	7.03	+	1.28	1
non-motor microtubule binding protein	68	40	34.13	+	1.17	1	heart development	181	116	90.85	+	1.28	1
chaperone	196	115	98.38	+	1.17	1	glycolysis	25	16	12.55	+	1.28	1
protein kinase	373	218	187.22	+	1.16	1	protein folding	155	99	77.8	+	1.27	1
isomerase	156	91	78.3	+	1.16	1	mRNA 3'-end processing	30	19	15.06	+	1.26	1
mutase	12	7	6.02	+	1.16	1	negative regulation of apoptotic process	95	60	47.68	+	1.26	1
DNA helicase	55	32	27.61	+	1.16	1	locomotion	65	41	32.62	+	1.26	1
metalloprotease	172	100	86.33	+	1.16	1	vitamin transport	59	37	29.61	+	1.25	1
oxygenase	74	43	37.14	+	1.16	1	angiogenesis	198	124	99.38	+	1.25	1
exoribonuclease	31	18	15.56	+	1.16	1	protein ADP-ribosylation	8	5	4.02	+	1.25	1
ligase	386	224	193.74	+	1.16	1	fatty acid biosynthetic process	42	26	21.08	+	1.23	1
actin family cytoskeletal protein	395	229	198.26	+	1.16	1	cellular amino acid biosynthetic process	81	50	40.66	+	1.23	1
protein phosphatase	187	108	93.86	+	1.15	1	polysaccharide metabolic process	192	118	96.37	+	1.22	1
kinase modulator	194	112	97.37	+	1.15	1	RNA localization	83	51	41.66	+	1.22	1
kinase activator	73	42	36.64	+	1.15	1	pyrimidine nucleobase metabolic process	54	33	27.1	+	1.22	1
nuclease	193	111	96.87	+	1.15	1	mRNA splicing, via spliceosome	183	111	91.85	+	1.21	1
calcium-binding protein	400	229	200.77	+	1.14	1	fatty acid beta-oxidation	33	20	16.56	+	1.21	1
pyrophosphatase	14	8	7.03	+	1.14	1	cellular calcium ion homeostasis	38	23	19.07	+	1.21	1
gap junction	21	12	10.54	+	1.14	1	tricarboxylic acid cycle	20	12	10.04	+	1.2	1
acetyltransferase	91	52	45.67	+	1.14	1	protein acetylation	35	21	17.57	+	1.2	1
voltage-gated potassium channel	86	49	43.17	+	1.14	1	growth	5	3	2.51	+	1.2	1
potassium channel	86	49	43.17	+	1.14	1	unsaturated fatty acid biosynthetic process	10	6	5.02	+	1.2	1
microtubule family cytoskeletal protein	225	128	112.93	+	1.13	1	skeletal system development	232	139	116.45	+	1.19	1
G-protein	211	120	105.91	+	1.13	1	generation of precursor metabolites and energy	274	164	137.53	+	1.19	1
glycosyltransferase	213	121	106.91	+	1.13	1	protein glycosylation	174	104	87.33	+	1.19	1
serine protease	287	163	144.05	+	1.13	1	anion transport	173	103	86.83	+	1.19	1
reductase	193	109	96.87	+	1.13	1	dorsal/ventral axis specification	32	19	16.06	+	1.18	1
kinase inhibitor	73	41	36.64	+	1.12	1	visual perception	219	130	109.92	+	1.18	1
protease	508	285	254.98	+	1.12	1	cytoskeleton organization	78	46	39.15	+	1.17	1
cell junction protein	173	97	86.83	+	1.12	1	regulation of liquid surface tension	56	33	28.11	+	1.17	1
DNA binding protein	765	428	383.97	+	1.11	1	homeostatic process	209	123	104.9	+	1.17	1
structural protein	163	91	81.81	+	1.11	1	regulation of translation	148	87	74.28	+	1.17	1
translation factor	104	58	52.2	+	1.11	1	phosphate ion transport	97	57	48.69	+	1.17	1
histone	63	35	31.62	+	1.11	1	receptor-mediated endocytosis	205	120	102.89	+	1.17	1
microtubule binding motor protein	72	40	36.14	+	1.11	1	sensory perception of taste	12	7	6.02	+	1.16	1
cyclic nucleotide-gated ion channel	18	10	9.03	+	1.11	1	endocytosis	373	217	187.22	+	1.16	1
nucleotide phosphatase	36	20	18.07	+	1.11	1	carbohydrate metabolic process	573	331	287.6	+	1.15	1
transcription cofactor	186	103	93.36	+	1.1	1	pattern specification process	196	113	98.38	+	1.15	1
phosphatase modulator	56	31	28.11	+	1.1	1	muscle organ development	288	166	144.55	+	1.15	1
nucleotide kinase	56	31	28.11	+	1.1	1	glycogen metabolic process	87	50	43.67	+	1.15	1
annexin	168	93	84.32	+	1.1	1	organelle organization	571	327	286.6	+	1.14	1
homeobox transcription factor	225	124	112.93	+	1.1	1	mitosis	367	210	184.21	+	1.14	1
helix-turn-helix transcription factor	225	124	112.93	+	1.1	1	respiratory electron transport chain	217	124	108.92	+	1.14	1
transfer/carrier protein	400	220	200.77	+	1.1	1	sex determination	7	4	3.51	+	1.14	1
ribonucleoprotein	51	28	25.6	+	1.09	1	anterior/posterior axis specification	28	16	14.05	+	1.14	1
helicase	126	69	63.24	+	1.09	1	lysosomal transport	44	25	22.08	+	1.13	1
centromere DNA-binding protein	42	23	21.08	+	1.09	1	extracellular transport	113	64	56.72	+	1.13	1
ATP-binding cassette (ABC) transporter	42	23	21.08	+	1.09	1	cell-cell signaling	633	358	317.72	+	1.13	1
non-receptor tyrosine protein kinase	97	53	48.69	+	1.09	1	protein complex biogenesis	108	61	54.21	+	1.13	1
ubiquitin-protein ligase	189	103	94.86	+	1.09	1	protein targeting	112	63	56.22	+	1.12	1
voltage-gated ion channel	136	74	68.26	+	1.08	1	segment specification	148	83	74.28	+	1.12	1
RNA helicase	81	44	40.66	+	1.08	1	protein complex assembly	107	60	53.71	+	1.12	1
intracellular calcium-sensing protein	304	165	152.58	+	1.08	1	protein localization	116	65	58.22	+	1.12	1
calmodulin	304	165	152.58	+	1.08	1	catabolic process	407	228	204.28	+	1.12	1
peroxidase	24	13	12.05	+	1.08	1	chromatin organization	250	140	125.48	+	1.12	1
ligand-gated ion channel	109	59	54.71	+	1.08	1	fatty acid metabolic process	202	113	101.39	+	1.11	1
carbohydrate phosphatase	13	7	6.52	+	1.07	1	cell differentiation	161	90	80.81	+	1.11	1
deacetylase	28	15	14.05	+	1.07	1	sensory perception of sound	68	38	34.13	+	1.11	1
zinc finger transcription factor	499	266	250.46	+	1.06	1	fertilization	61	34	30.62	+	1.11	1
translation elongation factor	47	25	23.59	+	1.06	1	exocytosis	258	143	129.5	+	1.1	1
membrane traffic protein	366	194	183.7	+	1.06	1	oxidative phosphorylation	56	31	28.11	+	1.1	1
voltage-gated sodium channel	36	19	18.07	+	1.05	1	DNA replication	161	89	80.81	+	1.1	1
sodium channel	36	19	18.07	+	1.05	1	response to stress	659	364	330.77	+	1.1	1
receptor	1596	841	801.07	+	1.05	1	DNA repair	172	95	86.33	+	1.1	1
hydratase	19	10	9.54	+	1.05	1	proteolysis	719	397	360.88	+	1.1	1
chromatin/chromatin-binding protein	184	96	92.35	+	1.04	1	meiosis	29	16	14.56	+	1.1	1
tumor necrosis factor receptor	23	12	11.54	+	1.04	1	DNA metabolic process	379	209	190.23	+	1.1	1
aspartic protease	25	13	12.55	+	1.04	1	mRNA polyadenylation	20	11	10.04	+	1.1	1
signaling molecule	1083	560	543.58	+	1.03	1	cellular glucose homeostasis	60	33	30.12	+	1.1	1
heterotrimeric G-protein	35	18	17.57	+	1.02	1	cell death	562	309	282.08	+	1.1	1
KRAB box transcription factor	341	175	171.16	+	1.02	1	death	566	311	284.09	+	1.09	1
glycosidase	39	20	19.57	+	1.02	1	blood coagulation	168	92	84.32	+	1.09	1
cell adhesion molecule	507	257	254.47	+	1.01	1	apoptotic process	548	299	275.05	+	1.09	1
G-protein coupled receptor	468	237	234.9	+	1.01	1	purine nucleobase metabolic process	88	48	44.17	+	1.09	1
membrane-bound signaling molecule	218	110	109.42	+	1.01	1	chromatin assembly	24	13	12.05	+	1.08	1
phosphatase inhibitor	36	18	18.07	-	1	1	phagocytosis	24	13	12.05	+	1.08	1
galactosidase	6	3	3.01	-	1	1	chromosome segregation	91	49	45.67	+	1.07	1
basic leucine zipper transcription factor	12	6	6.02	-	1	1	regulation of vasoconstriction	52	28	26.1	+	1.07	1
actin and actin related protein	30	15	15.06	-	1	1	neuron-neuron synaptic transmission	52	28	26.1	+	1.07	1
transaminase	24	12	12.05	-	1	1	cyclic nucleotide metabolic process	80	43	40.15	+	1.07	1
DNA topoisomerase	6	3	3.01	-	1	1	lipid transport	322	173	161.62	+	1.07	1
DNA photolyase	2	1	1	-	1	1	induction of apoptosis	129	69	64.75	+	1.07	1
CREB transcription factor	12	6	6.02	-	1	1	single-multicellular organism process	1636	868	821.14	+	1.06	1
protease inhibitor	245	121	122.97	-	0.98	1	multicellular organismal process	1640	870	823.15	+	1.06	1
apolipoprotein	84	41	42.16	-	0.97	1	response to external stimulus	378	200	189.73	+	1.05	1
immunoglobulin superfamily cell adhesion molecule	102	49	51.2	-	0.96	1	cellular amino acid catabolic process	53	28	26.6	+	1.05	1
storage protein	25	12	12.55	-	0.96	1	regulation of phosphate metabolic process	178	94	89.34	+	1.05	1
SNARE protein	42	20	21.08	-	0.95	1	macrophage activation	167	88	83.82	+	1.05	1
cysteine protease inhibitor	17	8	8.53	-	0.94	1	mRNA transcription	57	30	28.61	+	1.05	1
actin binding motor protein	60	28	30.12	-	0.93	1	response to abiotic stimulus	23	12	11.54	+	1.04	1
type I cytokine receptor	56	26	28.11	-	0.93	1	DNA recombination	50	26	25.1	+	1.04	1
cysteine protease	63	29	31.62	-	0.92	1	cellular defense response	231	120	115.94	+	1.03	1
acetylcholine receptor	46	21	23.09	-	0.91	1	system process	1296	673	650.49	+	1.03	1
GABA receptor	46	21	23.09	-	0.91	1	neurological system process	1064	552	534.04	+	1.03	1
Hsp90 family chaperone	11	5	5.52	-	0.91	1	response to interferon-gamma	39	20	19.57	+	1.02	1
defense/immunity protein	551	242	276.56	-	0.88	1	nitric oxide biosynthetic process	6	3	3.01	-	1	1
calcium channel	37	16	18.57	-	0.86	1	carbohydrate transport	78	39	39.15	-	1	1
voltage-gated calcium channel	37	16	18.57	-	0.86	1	behavior	20	10	10.04	-	1	1
myelin protein	21	9	10.54	-	0.85	1	cell killing	8	4	4.02	-	1	1
cytokine receptor	293	125	147.06	-	0.85	1	regulation of gene expression, epigenetic	8	4	4.02	-	1	1
peptide hormone	165	70	82.82	-	0.85	1	secondary metabolic process	2	1	1	-	1	1
phosphorylase	12	5	6.02	-	0.83	1	response to stimulus	2170	1085	1089.17	-	1	1
vesicle coat protein	41	17	20.58	-	0.83	1	cytokinesis	114	57	57.22	-	1	1
cytokine	196	79	98.38	-	0.8	1	muscle contraction	217	108	108.92	-	0.99	1
interleukin superfamily	35	14	17.57	-	0.8	1	immune system process	1391	689	698.17	-	0.99	1
viral protein	13	5	6.52	-	0.77	1	steroid metabolic process	179	88	89.84	-	0.98	1
type II cytokine receptor	13	5	6.52	-	0.77	1	cholesterol metabolic process	83	40	41.66	-	0.96	1
carbohydrate transporter	47	18	23.59	-	0.76	1	blood circulation	154	74	77.3	-	0.96	1
translation release factor	8	3	4.02	-	0.75	1	coenzyme metabolic process	103	49	51.7	-	0.95	1
DNA glycosylase	8	3	4.02	-	0.75	1	vitamin biosynthetic process	36	17	18.07	-	0.94	1
chemokine	49	18	24.59	-	0.73	1	nuclear transport	85	40	42.66	-	0.94	1
tumor necrosis factor family member	11	4	5.52	-	0.72	1	mammary gland development	15	7	7.53	-	0.93	1
complement component	51	18	25.6	-	0.7	1	regulation of cellular amino acid metabolic process	11	5	5.52	-	0.91	1
neuropeptide	30	10	15.06	-	0.66	1	cell proliferation	103	46	51.7	-	0.89	1
amylase	6	2	3.01	-	0.66	1	peroxisomal transport	18	8	9.03	-	0.89	1
major histocompatibility complex antigen	46	13	23.09	-	0.56	1	pentose-phosphate shunt	9	4	4.52	-	0.89	1
transketolase	5	1	2.51	-	0.4	1	hemopoiesis	112	49	56.22	-	0.87	1
viral coat protein	8	1	4.02	-	0.25	1	vitamin metabolic process	49	21	24.59	-	0.85	1
immunoglobulin	6	0	3.01	-	< 0.2	1	chromatin remodeling	7	3	3.51	-	0.85	1
primase	1	0	0.5	-	< 0.2	1	immune response	518	219	260	-	0.84	1
DNA polymerase processivity factor	1	0	0.5	-	< 0.2	1	sensory perception	455	192	228.37	-	0.84	1
							response to endogenous stimulus	57	24	28.61	-	0.84	1
							B cell mediated immunity	141	59	70.77	-	0.83	1
							acyl-CoA metabolic process	33	13	16.56	-	0.78	1
							response to biotic stimulus	41	15	20.58	-	0.73	1
							complement activation	45	16	22.59	-	0.71	1
							response to pheromone	6	2	3.01	-	0.66	1
							defense response to bacterium	25	8	12.55	-	0.64	1
							antigen processing and presentation	56	17	28.11	-	0.6	1
							antigen processing and presentation of peptide or polysaccharide antigen via MHC class II	38	10	19.07	-	0.52	1
							multi-multicellular organism process	1	0	0.5	-	< 0.2	1
							circadian rhythm	2	0	1	-	< 0.2	1
							pteridine-containing compound metabolic process	1	0	0.5	-	< 0.2	1
							vitamin catabolic process	1	0	0.5	-	< 0.2	1
							prosthetic group metabolic process	5	0	2.51	-	< 0.2	1
							nitrogen utilization	2	0	1	-	< 0.2	1
							ovulation cycle process	1	0	0.5	-	< 0.2	1
							circadian behavior	2	0	1	-	< 0.2	1
							rhythmic process	4	0	2.01	-	< 0.2	1
