# Supplementary material for: Differentially Expressed Genes and Signature Pathways of Human Prostate Cancer
Source: PLoS One. 2015 Dec 18;10(12):e0145322. doi: 10.1371/journal.pone.0145322 (PMC4687717; doi:10.1371/journal.pone.0145322)
Supplement: S7 Table — (XLSX) [file pone.0145322.s010.xlsx]

## Sheet: Sheet1
GSEA enrichment results for BioCarta, Reactome and KEGG gene sets
NAME	SIZE	ES	NES	NOM p-val	FDR q-val	FWER p-val	RANK AT MAX	LEADING EDGE	absNES
BIOCARTA_RANMS_PATHWAY	10	0.826665	1.65164	0.00402414	0.205089	0.446	3566	tags=100%, list=17%, signal=121%	1.65164
KEGG:hsa04014	225	-0.459664	-1.76019	0.00222717	0.212657	0.076	6562	tags=52%, list=32%, signal=75%	1.76019
KEGG:hsa05205	201	-0.49242	-1.74044	0	0.138238	0.101	5230	tags=48%, list=25%, signal=63%	1.74044
KEGG:hsa04390	153	-0.481743	-1.73338	0	0.0964781	0.104	5741	tags=51%, list=28%, signal=70%	1.73338
KEGG:hsa04510	207	-0.517	-1.72501	0.016129	0.0786987	0.11	4204	tags=44%, list=20%, signal=55%	1.72501
KEGG:hsa04024	200	-0.434312	-1.71907	0	0.0663152	0.112	7072	tags=55%, list=34%, signal=83%	1.71907
KEGG:hsa04020	180	-0.45626	-1.71401	0.00488998	0.0575409	0.117	7074	tags=56%, list=34%, signal=84%	1.71401
KEGG:hsa04022	167	-0.469166	-1.67712	0.0142857	0.0712265	0.163	5159	tags=46%, list=25%, signal=61%	1.67712
KEGG:hsa04350	80	-0.512647	-1.65391	0.0111359	0.0773077	0.194	5216	tags=56%, list=25%, signal=75%	1.65391
KEGG:hsa04070	82	-0.516789	-1.65323	0.00437637	0.06925	0.196	5767	tags=51%, list=28%, signal=71%	1.65323
KEGG:hsa04918	72	-0.465874	-1.65161	0.0118765	0.0634301	0.198	4495	tags=38%, list=22%, signal=48%	1.65161
KEGG:hsa05217	55	-0.48177	-1.64725	0.00659341	0.0610453	0.209	5230	tags=47%, list=25%, signal=63%	1.64725
KEGG:hsa04512	86	-0.517383	-1.63288	0.0375587	0.0651527	0.229	4502	tags=47%, list=22%, signal=59%	1.63288
KEGG:hsa05200	398	-0.43287	-1.62405	0.00877193	0.0648692	0.239	5230	tags=42%, list=25%, signal=56%	1.62405
KEGG:hsa04010	254	-0.417112	-1.61391	0.0022779	0.0677536	0.261	7383	tags=53%, list=36%, signal=82%	1.61391
KEGG:hsa04810	213	-0.44852	-1.60601	0.00898876	0.0683774	0.272	4141	tags=36%, list=20%, signal=45%	1.60601
KEGG:hsa04917	72	-0.461001	-1.60545	0.00451467	0.0643631	0.272	6562	tags=53%, list=32%, signal=77%	1.60545
KEGG:hsa04921	157	-0.4426	-1.60265	0.0165877	0.0626203	0.277	5176	tags=43%, list=25%, signal=57%	1.60265
KEGG:hsa04550	141	-0.432036	-1.59557	0.00455581	0.0635157	0.291	6547	tags=51%, list=32%, signal=74%	1.59557
BIOCARTA_P38MAPK_PATHWAY	40	-0.526594	-1.5836	0.00814664	0.247988	0.615	7359	tags=68%, list=36%, signal=105%	1.5836
BIOCARTA_PDGF_PATHWAY	32	-0.574277	-1.58224	0.0243446	0.23779	0.619	7170	tags=72%, list=35%, signal=110%	1.58224
BIOCARTA_ARENRF2_PATHWAY	13	-0.652756	-1.57588	0.0237154	0.24	0.628	6612	tags=77%, list=32%, signal=113%	1.57588
KEGG:hsa04310	139	-0.435371	-1.57509	0.00668151	0.0775109	0.331	6441	tags=51%, list=31%, signal=74%	1.57509
BIOCARTA_NOS1_PATHWAY	21	-0.56715	-1.57468	0.027833	0.230981	0.633	6710	tags=76%, list=33%, signal=113%	1.57468
BIOCARTA_SPPA_PATHWAY	22	-0.522265	-1.57051	0.0166667	0.228329	0.639	2582	tags=36%, list=13%, signal=42%	1.57051
BIOCARTA_INSULIN_PATHWAY	22	-0.58244	-1.56578	0.0195695	0.22853	0.648	6898	tags=77%, list=34%, signal=116%	1.56578
BIOCARTA_PLATELETAPP_PATHWAY	14	-0.641165	-1.56559	0.0452586	0.219134	0.648	4429	tags=57%, list=22%, signal=73%	1.56559
BIOCARTA_TRKA_PATHWAY	12	-0.655702	-1.56147	0.0338645	0.218113	0.653	4784	tags=67%, list=23%, signal=87%	1.56147
KEGG:hsa04015	211	-0.419567	-1.55633	0.0290179	0.0877944	0.362	5211	tags=39%, list=25%, signal=52%	1.55633
KEGG:hsa04919	119	-0.474212	-1.55338	0.0198676	0.0855403	0.368	5230	tags=44%, list=25%, signal=58%	1.55338
KEGG:hsa05222	86	-0.474111	-1.55209	0.0172414	0.0826819	0.371	5771	tags=50%, list=28%, signal=69%	1.55209
KEGG:hsa05211	66	-0.513848	-1.55186	0.0247423	0.0793969	0.371	5237	tags=52%, list=26%, signal=69%	1.55186
BIOCARTA_PGC1A_PATHWAY	23	-0.602763	-1.54422	0.0449898	0.24133	0.674	4418	tags=65%, list=22%, signal=83%	1.54422
BIOCARTA_CCR3_PATHWAY	23	-0.545878	-1.544	0.0366133	0.23264	0.674	4995	tags=52%, list=24%, signal=69%	1.544
BIOCARTA_INTEGRIN_PATHWAY	38	-0.551837	-1.54302	0.060241	0.22592	0.675	4204	tags=53%, list=20%, signal=66%	1.54302
KEGG:hsa04151	345	-0.383624	-1.54263	0.0290828	0.0826618	0.388	6660	tags=41%, list=32%, signal=60%	1.54263
BIOCARTA_NO1_PATHWAY	30	-0.541249	-1.54215	0.0572034	0.219844	0.677	6340	tags=67%, list=31%, signal=96%	1.54215
BIOCARTA_CD40_PATHWAY	15	-0.638477	-1.53905	0.0509434	0.218806	0.68	4000	tags=53%, list=19%, signal=66%	1.53905
BIOCARTA_PTEN_PATHWAY	18	-0.627938	-1.53711	0.0310786	0.21517	0.684	4995	tags=61%, list=24%, signal=81%	1.53711
BIOCARTA_HDAC_PATHWAY	29	-0.534139	-1.53582	0.0583501	0.210448	0.685	5767	tags=59%, list=28%, signal=81%	1.53582
BIOCARTA_IL1R_PATHWAY	33	-0.527148	-1.53068	0.0390144	0.210958	0.689	7449	tags=73%, list=36%, signal=114%	1.53068
KEGG:hsa04912	91	-0.432455	-1.52916	0.00917431	0.0920904	0.413	7170	tags=55%, list=35%, signal=84%	1.52916
KEGG:hsa04915	100	-0.422579	-1.52669	0.0179775	0.0898547	0.416	7094	tags=54%, list=35%, signal=82%	1.52669
BIOCARTA_TCR_PATHWAY	44	-0.534925	-1.52257	0.0546875	0.219322	0.702	7359	tags=66%, list=36%, signal=103%	1.52257
BIOCARTA_EGF_PATHWAY	31	-0.558845	-1.51943	0.0503731	0.217093	0.704	7170	tags=71%, list=35%, signal=109%	1.51943
BIOCARTA_FCER1_PATHWAY	38	-0.530384	-1.51927	0.042065	0.211365	0.704	7404	tags=74%, list=36%, signal=115%	1.51927
BIOCARTA_AGR_PATHWAY	36	-0.521851	-1.51855	0.042	0.206706	0.705	6246	tags=58%, list=30%, signal=84%	1.51855
BIOCARTA_NFAT_PATHWAY	53	-0.456533	-1.51552	0.0433839	0.206008	0.71	6559	tags=55%, list=32%, signal=80%	1.51552
BIOCARTA_TPO_PATHWAY	24	-0.569271	-1.51515	0.0507519	0.201411	0.712	6898	tags=75%, list=34%, signal=113%	1.51515
BIOCARTA_ERK5_PATHWAY	18	-0.591638	-1.51276	0.0433145	0.199987	0.717	6517	tags=72%, list=32%, signal=106%	1.51276
KEGG:hsa04670	116	-0.427101	-1.51258	0.0504587	0.0964106	0.437	5756	tags=42%, list=28%, signal=58%	1.51258
BIOCARTA_BCR_PATHWAY	34	-0.531905	-1.51202	0.0354331	0.196046	0.718	7404	tags=74%, list=36%, signal=115%	1.51202
BIOCARTA_KERATINOCYTE_PATHWAY	46	-0.492115	-1.51161	0.0478927	0.191919	0.719	7170	tags=63%, list=35%, signal=97%	1.51161
BIOCARTA_NTHI_PATHWAY	24	-0.565781	-1.51065	0.0585938	0.188702	0.719	4000	tags=50%, list=19%, signal=62%	1.51065
KEGG:hsa04630	156	-0.408681	-1.5035	0.049217	0.100256	0.45	7530	tags=44%, list=37%, signal=68%	1.5035
BIOCARTA_CCR5_PATHWAY	17	-0.601074	-1.49492	0.0587045	0.206435	0.736	6612	tags=71%, list=32%, signal=104%	1.49492
BIOCARTA_ECM_PATHWAY	24	-0.555504	-1.49318	0.0766283	0.204749	0.737	4995	tags=58%, list=24%, signal=77%	1.49318
BIOCARTA_EPHA4_PATHWAY	10	-0.67191	-1.49197	0.0795918	0.202031	0.739	4369	tags=70%, list=21%, signal=89%	1.49197
BIOCARTA_GCR_PATHWAY	19	-0.543181	-1.47938	0.076	0.215921	0.755	5767	tags=53%, list=28%, signal=73%	1.47938
KEGG:hsa04920	70	-0.412893	-1.47862	0.0228833	0.117432	0.491	7151	tags=49%, list=35%, signal=74%	1.47862
BIOCARTA_TOB1_PATHWAY	19	-0.583252	-1.47849	0.109131	0.212572	0.755	5216	tags=47%, list=25%, signal=63%	1.47849
BIOCARTA_GLEEVEC_PATHWAY	23	-0.545276	-1.47503	0.0592734	0.212221	0.758	7170	tags=70%, list=35%, signal=107%	1.47503
BIOCARTA_ETS_PATHWAY	18	-0.562574	-1.4742	0.0533333	0.209082	0.759	6612	tags=78%, list=32%, signal=115%	1.4742
BIOCARTA_IL2RB_PATHWAY	38	-0.510368	-1.46988	0.0742972	0.211776	0.767	5994	tags=55%, list=29%, signal=78%	1.46988
BIOCARTA_CREB_PATHWAY	27	-0.541278	-1.46686	0.0732673	0.212243	0.773	6779	tags=70%, list=33%, signal=105%	1.46686
KEGG:hsa04621	57	-0.471591	-1.46637	0.0741525	0.122695	0.509	7495	tags=65%, list=37%, signal=102%	1.46637
KEGG:hsa04066	103	-0.402146	-1.46635	0.0437637	0.118737	0.509	6559	tags=45%, list=32%, signal=65%	1.46635
KEGG:hsa04611	129	-0.423023	-1.46522	0.0677201	0.116936	0.51	5886	tags=40%, list=29%, signal=56%	1.46522
KEGG:hsa04080	273	-0.344069	-1.46456	0.0505618	0.113922	0.51	6502	tags=39%, list=32%, signal=56%	1.46456
BIOCARTA_GPCR_PATHWAY	34	-0.504027	-1.45356	0.0722656	0.227568	0.787	6898	tags=62%, list=34%, signal=93%	1.45356
BIOCARTA_TALL1_PATHWAY	15	-0.58956	-1.45174	0.0782443	0.225624	0.789	6246	tags=60%, list=30%, signal=86%	1.45174
KEGG:hsa04540	89	-0.407741	-1.44935	0.0440835	0.121847	0.523	2967	tags=28%, list=14%, signal=33%	1.44935
BIOCARTA_NGF_PATHWAY	18	-0.558025	-1.44824	0.0539499	0.226216	0.793	6898	tags=72%, list=34%, signal=109%	1.44824
BIOCARTA_AT1R_PATHWAY	33	-0.517091	-1.44498	0.0639535	0.226346	0.797	7359	tags=73%, list=36%, signal=113%	1.44498
BIOCARTA_IGF1_PATHWAY	21	-0.547483	-1.44308	0.0660377	0.225206	0.797	6898	tags=71%, list=34%, signal=107%	1.44308
KEGG:hsa04340	51	-0.432131	-1.44241	0.0487239	0.123696	0.531	6340	tags=45%, list=31%, signal=65%	1.44241
BIOCARTA_CTCF_PATHWAY	23	-0.546457	-1.44177	0.0939335	0.223036	0.799	5756	tags=61%, list=28%, signal=84%	1.44177
BIOCARTA_TGFB_PATHWAY	19	-0.584138	-1.44041	0.0828829	0.221081	0.801	6052	tags=68%, list=29%, signal=97%	1.44041
BIOCARTA_NKCELLS_PATHWAY	20	-0.54496	-1.43969	0.11157	0.218634	0.802	5984	tags=60%, list=29%, signal=85%	1.43969
BIOCARTA_CXCR4_PATHWAY	24	-0.507783	-1.43607	0.0689655	0.220264	0.806	4995	tags=46%, list=24%, signal=60%	1.43607
KEGG:hsa04911	86	-0.372664	-1.4322	0.0495049	0.128505	0.539	4520	tags=34%, list=22%, signal=43%	1.4322
KEGG:hsa05202	175	-0.371129	-1.43112	0.0350467	0.126049	0.541	5299	tags=37%, list=26%, signal=50%	1.43112
KEGG:hsa04012	87	-0.438126	-1.42994	0.0912951	0.123577	0.543	7267	tags=57%, list=35%, signal=89%	1.42994
KEGG:hsa03320	69	-0.367806	-1.42952	0.0431472	0.120958	0.544	4864	tags=33%, list=24%, signal=44%	1.42952
BIOCARTA_ACE2_PATHWAY	13	-0.575047	-1.42637	0.106576	0.228671	0.81	4429	tags=54%, list=22%, signal=69%	1.42637
BIOCARTA_PYK2_PATHWAY	28	-0.531723	-1.42402	0.0809793	0.22805	0.812	7359	tags=75%, list=36%, signal=117%	1.42402
BIOCARTA_VITCB_PATHWAY	11	-0.605078	-1.42321	0.111111	0.22554	0.813	4429	tags=64%, list=22%, signal=81%	1.42321
KEGG:hsa04520	73	-0.469774	-1.42184	0.104121	0.12385	0.553	4409	tags=41%, list=21%, signal=52%	1.42184
KEGG:hsa04530	136	-0.398343	-1.42102	0.0731132	0.121339	0.554	5741	tags=38%, list=28%, signal=52%	1.42102
BIOCARTA_FMLP_PATHWAY	36	-0.466891	-1.41565	0.0717132	0.232717	0.819	5159	tags=47%, list=25%, signal=63%	1.41565
BIOCARTA_MEF2D_PATHWAY	18	-0.533826	-1.40813	0.112186	0.239617	0.822	5856	tags=61%, list=29%, signal=85%	1.40813
BIOCARTA_ATM_PATHWAY	20	-0.522854	-1.40449	0.0924855	0.241418	0.824	7312	tags=70%, list=36%, signal=109%	1.40449
BIOCARTA_STRESS_PATHWAY	25	-0.511285	-1.40446	0.0871212	0.237884	0.824	7170	tags=64%, list=35%, signal=98%	1.40446
BIOCARTA_IL7_PATHWAY	17	-0.631876	-1.40325	0.121331	0.235992	0.824	6425	tags=71%, list=31%, signal=103%	1.40325
BIOCARTA_SPRY_PATHWAY	18	-0.541027	-1.40287	0.107664	0.233276	0.825	4995	tags=61%, list=24%, signal=81%	1.40287
BIOCARTA_HSP27_PATHWAY	15	-0.528859	-1.40014	0.105991	0.233485	0.827	7847	tags=73%, list=38%, signal=119%	1.40014
BIOCARTA_CDMAC_PATHWAY	16	-0.52774	-1.39812	0.0888889	0.232869	0.828	7021	tags=69%, list=34%, signal=104%	1.39812
KEGG:hsa04910	140	-0.395373	-1.39762	0.0842572	0.135923	0.574	6562	tags=44%, list=32%, signal=65%	1.39762
BIOCARTA_TOLL_PATHWAY	37	-0.481614	-1.39739	0.114019	0.230922	0.829	7885	tags=68%, list=38%, signal=109%	1.39739
BIOCARTA_CARM1_PATHWAY	13	-0.596321	-1.39653	0.0944444	0.228794	0.83	6965	tags=77%, list=34%, signal=116%	1.39653
KEGG:hsa04064	90	-0.434146	-1.39415	0.108384	0.136075	0.579	7442	tags=52%, list=36%, signal=82%	1.39415
KEGG:hsa05231	100	-0.390321	-1.39289	0.0683761	0.134055	0.579	7027	tags=49%, list=34%, signal=74%	1.39289
BIOCARTA_PLCE_PATHWAY	12	-0.53927	-1.39263	0.0884774	0.230375	0.831	6340	tags=58%, list=31%, signal=84%	1.39263
KEGG:hsa04668	110	-0.418619	-1.39051	0.129237	0.132636	0.58	7021	tags=53%, list=34%, signal=80%	1.39051
BIOCARTA_HCMV_PATHWAY	17	-0.562077	-1.38931	0.11418	0.231263	0.832	5814	tags=65%, list=28%, signal=90%	1.38931
BIOCARTA_41BB_PATHWAY	17	-0.520867	-1.38621	0.11546	0.232756	0.834	6612	tags=53%, list=32%, signal=78%	1.38621
BIOCARTA_TFF_PATHWAY	21	-0.523444	-1.38556	0.129344	0.230554	0.834	7225	tags=71%, list=35%, signal=110%	1.38556
BIOCARTA_IGF1R_PATHWAY	23	-0.511039	-1.38247	0.102913	0.231881	0.835	6898	tags=65%, list=34%, signal=98%	1.38247
BIOCARTA_BAD_PATHWAY	26	-0.478493	-1.38228	0.109405	0.229228	0.835	6340	tags=54%, list=31%, signal=78%	1.38228
BIOCARTA_EPONFKB_PATHWAY	11	-0.553238	-1.38077	0.109827	0.228161	0.835	5176	tags=55%, list=25%, signal=73%	1.38077
KEGG:hsa05206	149	-0.40569	-1.37266	0.10793	0.14376	0.591	6517	tags=49%, list=32%, signal=71%	1.37266
BIOCARTA_AKT_PATHWAY	22	-0.504093	-1.37036	0.112167	0.238771	0.839	6198	tags=50%, list=30%, signal=72%	1.37036
KEGG:hsa05216	29	-0.441398	-1.3648	0.111354	0.146401	0.598	5127	tags=45%, list=25%, signal=60%	1.3648
BIOCARTA_FEEDER_PATHWAY	9	-0.570958	-1.36359	0.14553	0.245094	0.844	5343	tags=67%, list=26%, signal=90%	1.36359
KEGG:hsa04620	105	-0.379598	-1.36336	0.110647	0.144656	0.601	7885	tags=50%, list=38%, signal=80%	1.36336
KEGG:hsa04622	70	-0.376706	-1.36023	0.0995935	0.144641	0.608	7530	tags=44%, list=37%, signal=70%	1.36023
BIOCARTA_IL6_PATHWAY	22	-0.519589	-1.35887	0.134122	0.2479	0.849	6898	tags=68%, list=34%, signal=103%	1.35887
BIOCARTA_RACCYCD_PATHWAY	26	-0.492601	-1.35733	0.130189	0.246832	0.849	7839	tags=69%, list=38%, signal=112%	1.35733
KEGG:hsa04068	131	-0.385525	-1.35713	0.118943	0.14401	0.609	7134	tags=48%, list=35%, signal=73%	1.35713
KEGG:hsa04922	102	-0.381603	-1.35497	0.112128	0.143437	0.611	6779	tags=46%, list=33%, signal=68%	1.35497
KEGG:hsa05221	57	-0.430889	-1.34339	0.154004	0.149612	0.622	6995	tags=49%, list=34%, signal=74%	1.34339
KEGG:hsa04071	120	-0.384453	-1.33177	0.139583	0.155468	0.63	5852	tags=41%, list=29%, signal=57%	1.33177
KEGG:hsa04514	138	-0.380134	-1.32151	0.18427	0.161112	0.639	6670	tags=43%, list=32%, signal=64%	1.32151
KEGG:hsa04060	264	-0.365627	-1.30988	0.199085	0.167284	0.645	8174	tags=48%, list=40%, signal=78%	1.30988
KEGG:hsa04210	85	-0.397718	-1.3083	0.164241	0.165519	0.646	7044	tags=53%, list=34%, signal=80%	1.3083
KEGG:hsa04666	91	-0.396757	-1.30473	0.148847	0.1652	0.646	5838	tags=40%, list=28%, signal=55%	1.30473
KEGG:hsa05220	73	-0.423588	-1.30216	0.177966	0.164421	0.649	6562	tags=51%, list=32%, signal=74%	1.30216
KEGG:hsa05210	62	-0.417455	-1.27815	0.216102	0.182827	0.668	7359	tags=58%, list=36%, signal=90%	1.27815
KEGG:hsa04062	187	-0.357458	-1.26665	0.203905	0.19201	0.679	9251	tags=59%, list=45%, signal=107%	1.26665
KEGG:hsa05215	89	-0.383287	-1.26106	0.216561	0.193284	0.682	6530	tags=44%, list=32%, signal=64%	1.26106
KEGG:hsa04664	69	-0.372718	-1.25892	0.178344	0.191821	0.683	7404	tags=48%, list=36%, signal=75%	1.25892
KEGG:hsa05214	65	-0.376628	-1.24446	0.243304	0.201326	0.69	6995	tags=49%, list=34%, signal=74%	1.24446
KEGG:hsa05218	71	-0.341444	-1.21856	0.201389	0.221687	0.705	2736	tags=21%, list=13%, signal=24%	1.21856
KEGG:hsa04913	50	-0.310532	-1.20913	0.173228	0.226448	0.711	7072	tags=40%, list=34%, signal=61%	1.20913
KEGG:hsa04650	126	-0.333379	-1.20229	0.270968	0.228739	0.714	7882	tags=45%, list=38%, signal=73%	1.20229
KEGG:hsa05223	56	-0.384584	-1.20226	0.278481	0.225325	0.714	4995	tags=36%, list=24%, signal=47%	1.20226
KEGG:hsa04152	123	-0.339672	-1.19995	0.267261	0.224446	0.715	6621	tags=41%, list=32%, signal=61%	1.19995
KEGG:hsa05212	66	-0.387566	-1.18468	0.320755	0.233595	0.722	7359	tags=53%, list=36%, signal=82%	1.18468
KEGG:hsa04660	104	-0.365344	-1.16789	0.323529	0.244646	0.732	7267	tags=43%, list=35%, signal=67%	1.16789
KEGG:hsa04662	72	-0.367046	-1.16603	0.301255	0.243132	0.734	7882	tags=53%, list=38%, signal=85%	1.16603
