# Supplementary material for: Differentially Expressed Genes and Signature Pathways of Human Prostate Cancer
Source: PLoS One. 2015 Dec 18;10(12):e0145322. doi: 10.1371/journal.pone.0145322 (PMC4687717; doi:10.1371/journal.pone.0145322)
Supplement: S8 Table — These genes and transcripts from the evaluated TCGA dataset contribute to the enrichment of the KEGG Calcium Signaling Pathway in non-malignant samples. (XLSX) [file pone.0145322.s011.xlsx]

## Sheet: Sheet1
Genes and Transcripts contributing to KEGG Calcium Signaling Pathway enrichment in GSEA
Differentially Expressed
Gene	Symbol	Expression
Adenylate cyclase type 3	ADCY3	Down-Regulated
Adenylate cyclase type 8	ADCY8	Down-Regulated
Adenylate cyclase type 9	ADCY9	Down-Regulated
Adenosine receptor A2b	ADORA2B	Down-Regulated
Alpha-1A adrenergic receptor	ADRA1A	Down-Regulated
Alpha-1B adrenergic receptor	ADRA1B	Down-Regulated
Alpha-1D adrenergic receptor	ADRA1D	Down-Regulated
Beta-3 adrenergic receptor	ADRB3	Down-Regulated
Sarcoplasmic/endoplasmic reticulum calcium ATPase 1	ATP2A1	Down-Regulated
Sarcoplasmic/endoplasmic reticulum calcium ATPase 2	ATP2A2	Down-Regulated
Sarcoplasmic/endoplasmic reticulum calcium ATPase 3	ATP2A3	Down-Regulated
Plasma membrane calcium-transporting ATPase 2	ATP2B2	Down-Regulated
Plasma membrane calcium-transporting ATPase 3	ATP2B3	Down-Regulated
Plasma membrane calcium-transporting ATPase 4	ATP2B4	Down-Regulated
Vasopressin V1a receptor	AVPR1A	Down-Regulated
B2 bradykinin receptor	BDKRB2	Down-Regulated
Voltage-dependent L-type calcium channel subunit alpha-1C	CACNA1C	Down-Regulated
Voltage-dependent L-type calcium channel subunit alpha-1F	CACNA1F	Down-Regulated
Voltage-dependent T-type calcium channel subunit alpha-1H	CACNA1H	Down-Regulated
Calmodulin 1	CALM1	Down-Regulated
Calmodulin-like protein 3	CALML3	Down-Regulated
Calcium/calmodulin-dependent protein kinase type II subunit alpha	CAMK2A	Down-Regulated
Calcium/calmodulin-dependent protein kinase type II subunit delta	CAMK2D	Down-Regulated
Calcium/calmodulin-dependent protein kinase type II subunit gamma	CAMK2G	Down-Regulated
Calcium/calmodulin-dependent protein kinase type IV	CAMK4	Down-Regulated
Gastrin/cholecystokinin type B receptor	CCKBR	Down-Regulated
ADP-ribosyl cyclase/cyclic ADP-ribose hydrolase 1	CD38	Down-Regulated
Muscarinic acetylcholine receptor M2	CHRM2	Down-Regulated
Neuronal acetylcholine receptor subunit alpha-7	CHRNA7	Down-Regulated
Cysteinyl leukotriene receptor 1	CYSLTR1	Down-Regulated
Cysteinyl leukotriene receptor 2	CYSLTR2	Down-Regulated
D(1A) dopamine receptor	DRD1	Down-Regulated
D(1B) dopamine receptor	DRD5	Down-Regulated
Endothelin-1 receptor	EDNRA	Down-Regulated
Endothelin B receptor	EDNRB	Down-Regulated
Epidermal growth factor receptor	EGFR	Down-Regulated
Receptor tyrosine-protein kinase erbB-4	ERBB4	Down-Regulated
Guanine nucleotide-binding protein subunit alpha-11	GNA11	Down-Regulated
Guanine nucleotide-binding protein subunit alpha-14	GNA14	Down-Regulated
Guanine nucleotide-binding protein G(olf) subunit alpha	GNAL	Down-Regulated
Guanine nucleotide-binding protein G(q) subunit alpha	GNAQ	Down-Regulated
Glutamate receptor ionotropic, NMDA 2A	GRIN2A	Down-Regulated
Metabotropic glutamate receptor 1	GRM1	Down-Regulated
Histamine H1 receptor	HRH1	Down-Regulated
Histamine H2 receptor	HRH2	Down-Regulated
5-hydroxytryptamine receptor 7	HTR7	Down-Regulated
Inositol-trisphosphate 3-kinase A	ITPKA	Down-Regulated
Inositol-trisphosphate 3-kinase C	ITPKC	Down-Regulated
Inositol 1,4,5-trisphosphate receptor type 1	ITPR1	Down-Regulated
Myosin light chain kinase, smooth muscle	MYLK	Down-Regulated
Myosin light chain kinase family member 4	MYLK4	Down-Regulated
Nitric oxide synthase, brain	NOS1	Down-Regulated
Neurotensin receptor type 1	NTSR1	Down-Regulated
P2X purinoceptor 1	P2RX1	Down-Regulated
P2X purinoceptor 2	P2RX2	Down-Regulated
P2X purinoceptor 6	P2RX6	Down-Regulated
P2X purinoceptor 7	P2RX7	Down-Regulated
Calcium/calmodulin-dependent 3',5'-cyclic nucleotide phosphodiesterase 1B	PDE1B	Down-Regulated
Calcium/calmodulin-dependent 3',5'-cyclic nucleotide phosphodiesterase 1C	PDE1C	Down-Regulated
Platelet-derived growth factor receptor alpha	PDGFRA	Down-Regulated
1-phosphatidylinositol 4,5-bisphosphate phosphodiesterase beta-1	PLCB1	Down-Regulated
1-phosphatidylinositol 4,5-bisphosphate phosphodiesterase delta-1	PLCD1	Down-Regulated
1-phosphatidylinositol 4,5-bisphosphate phosphodiesterase delta-3	PLCD3	Down-Regulated
1-phosphatidylinositol 4,5-bisphosphate phosphodiesterase delta-4	PLCD4	Down-Regulated
1-phosphatidylinositol 4,5-bisphosphate phosphodiesterase epsilon-1	PLCE1	Down-Regulated
1-phosphatidylinositol 4,5-bisphosphate phosphodiesterase gamma-2	PLCG2	Down-Regulated
Cardiac phospholamban	PLN	Down-Regulated
Serine/threonine-protein phosphatase 2B catalytic subunit beta isoform	PPP3CB	Down-Regulated
cAMP-dependent protein kinase catalytic subunit alpha	PRKACA	Down-Regulated
cAMP-dependent protein kinase catalytic subunit gamma	PRKACG	Down-Regulated
Protein kinase C alpha type	PRKCA	Down-Regulated
Protein kinase C beta type	PRKCB	Down-Regulated
cAMP-dependent protein kinase catalytic subunit PRKX	PRKX	Down-Regulated
Platelet-activating factor receptor	PTAFR	Down-Regulated
Prostaglandin E2 receptor EP3 subtype	PTGER3	Down-Regulated
Ryanodine receptor 3	RYR3	Down-Regulated
ADP/ATP translocase 1	SLC25A4	Down-Regulated
Sodium/calcium exchanger 1	SLC8A1	Down-Regulated
Sodium/calcium exchanger 2	SLC8A2	Down-Regulated
Substance-K receptor	TACR2	Down-Regulated
Thromboxane A2 receptor	TBXA2R	Down-Regulated
Not Differentially Expressed
Adenylate cyclase type 2	ADCY2	Down-Regulated
Adenylate cyclase type 7	ADCY7	Down-Regulated
B1 bradykinin receptor	BDKRB1	Down-Regulated
Voltage-dependent P/Q-type calcium channel subunit alpha-1A	CACNA1A	Down-Regulated
Calmodulin 2	CALM2	Down-Regulated
Calmodulin 3	CALM3	Down-Regulated
Muscarinic acetylcholine receptor M1	CHRM1	Down-Regulated
5-hydroxytryptamine receptor 2C	HTR2C	Down-Regulated
Inositol-trisphosphate 3-kinase B	ITPKB	Down-Regulated
Leukotriene B4 receptor 2	LTB4R2	Down-Regulated
1-phosphatidylinositol 4,5-bisphosphate phosphodiesterase zeta-1	PLCZ1	Down-Regulated
Peptidyl-prolyl cis-trans isomerase F, mitochondrial	PPIF	Down-Regulated
Serine/threonine-protein phosphatase 2B catalytic subunit gamma isoform	PPP3CC	Down-Regulated
Calcineurin subunit B type 1	PPP3R1	Down-Regulated
Protein-tyrosine kinase 2-beta	PTK2B	Down-Regulated
Ryanodine receptor 2	RYR2	Down-Regulated
Stromal interaction molecule 2	STIM2	Down-Regulated
Neuromedin-K receptor	TACR3	Down-Regulated
Voltage-dependent anion-selective channel protein 3	VDAC3	Down-Regulated
