# Supplementary material for: Differentially Expressed Genes and Signature Pathways of Human Prostate Cancer
Source: PLoS One. 2015 Dec 18;10(12):e0145322. doi: 10.1371/journal.pone.0145322 (PMC4687717; doi:10.1371/journal.pone.0145322)
Supplement: S9 Table — (XLSX) [file pone.0145322.s012.xlsx]

## Sheet: Sheet1
Complete SPIA results for KEGG pathways
Name	ID	pSize	NDE	pNDE	tA	pPERT	pG	pGFdr	pGFWER	Status	KEGGLINK
Proteoglycans in cancer	5205	201	140	1.74976e-05	-104.144	5e-06	2.11367e-09	1.86003e-07	1.86003e-07	Inhibited	http://www.genome.jp/dbget-bin/show_pathway?hsa05205+7074+387+6093+9475+287+23533+5290+5291+5293+5294+5295+5296+8503+207+208+4659+4660+54776+5499+5501+3708+3709+815+816+817+818+2316+2318+51196+23365+6548+2549+998+5058+60+71+8826+5594+22808+3265+6237+673+5604+5605+5595+29102+2017+7410+9138+595+4087+7157+4318+5328+1499+84309+5829+5578+1634+7097+2065+2066+4609+4233+23624+867+7078+4313+7422+3091+3593…
Hippo signaling pathway	4390	153	112	3.12186e-06	-51.8268	0.016	8.89717e-07	3.91475e-05	7.82951e-05	Inhibited	http://www.genome.jp/dbget-bin/show_pathway?hsa04390+23286+4771+122786+79981+10413+25937+26524+9113+23418+286204+1496+29119+11186+332+374+5499+5501+10971+7529+7531+7532+7533+55233+92597+154796+3993+3996+23513+1739+1741+1742+7003+7005+8463+84962+60+71+56288+50855+84552+84612+5590+7161+4087+4088+1453+1454+7042+7043+7046+7048+4089+4092+51384+7472+7473+7475+7476+7479+7480+7482+7484+80326+81029+89780+…
Pathways in cancer	5200	398	257	7.77293e-05	-137.756	0.002	2.59257e-06	7.60486e-05	0.000228146	Inhibited	http://www.genome.jp/dbget-bin/show_pathway?hsa05200+1630+1499+51384+7472+7473+7475+7476+7479+7480+7482+7484+80326+81029+89780+1496+29119+3688+1855+1856+1282+1284+1285+1286+1287+1288+22798+2335+3908+3909+3910+3911+3912+3913+3914+3655+3673+3674+3675+5728+11211+2535+7855+7976+8321+8324+8325+26060+1398+1399+23624+867+23533+5290+5291+5293+5294+5295+5296+8503+6776+6777+3716+1956+5156+3815+2322+4233+22…
Focal adhesion	4510	207	144	1.48178e-05	-72.8498	0.021	4.97345e-06	0.000109416	0.000437663	Inhibited	http://www.genome.jp/dbget-bin/show_pathway?hsa04510+3688+3690+3691+3694+3696+3655+3672+3673+3674+3675+3678+3679+3680+8516+2316+2318+998+340156+4638+85366+91807+10398+4636+1729+4659+4660+54776+5499+5501+6093+9475+207+208+29780+55742+64098+3611+7414+5728+23533+5290+5291+5293+5294+5295+5296+8503+7094+7791+23396+81+87+88+89+5829+2909+394+5578+5579+2534+387+5923+1101+1277+1280+1282+1284+1285+1286+128…
cGMP-PKG signaling pathway	4022	167	118	2.79966e-05	-19.939	0.307	0.000108849	0.00191575	0.00957874	Inhibited	http://www.genome.jp/dbget-bin/show_pathway?hsa04022+4659+5499+5501+10398+4881+5592+5593+2977+2982+3708+3709+10242+157855+27094+27345+3778+3779+4882+10335+8654+1258+146+147+148+150+151+152+185+1909+1910+23236+5332+775+776+778+387+6093+9475+2767+2776+7225+5530+5532+5535+4773+4775+4776+100271849+4205+4208+4209+2626+6722+487+488+489+5350+3764+5604+5605+5594+5595+572+1386+148327+468+90993+6543+6546+4…
Calcium signaling pathway	4020	180	115	0.0108227	-48.4168	0.004	0.000478258	0.00701445	0.0420867	Inhibited	http://www.genome.jp/dbget-bin/show_pathway?hsa04020+3706+80271+107+109+114+5137+5153+4842+4846+7416+6543+6546+814+815+816+817+818+5530+5532+5535+5578+5579+952+51196+1956+2065+2066+5156+2767+2776+9630+1139+22953+2902+2903+5023+5025+5026+5027+9127+5336+56848+8877+340156+4638+85366+91807+113026+5333+84812+3708+3709+5256+5261+6261+6263+23236+5332+93129+775+776+778+10800+1129+146+147+148+185+1909+191…
Ras signaling pathway	4014	225	144	0.00436021	-74.2262	0.029	0.00126139	0.0158575	0.111002	Inhibited	http://www.genome.jp/dbget-bin/show_pathway?hsa04014+5594+5595+5604+5605+22808+3265+6237+6654+6655+207+208+23533+5290+5291+5293+5294+5295+5296+8503+25759+399694+53358+6464+1435+1943+1944+1945+1946+1950+2246+2247+2252+2254+2255+2256+2258+2259+2277+27006+284+4254+4803+51378+5154+5228+56034+7422+80310+8074+8817+8822+9965+1956+1969+2260+2263+2324+3791+3815+4233+4804+5156+7010+2549+9846+5781+7074+5881…
TGF-beta signaling pathway	4350	80	60	0.000195486	2.42641	0.854	0.00161901	0.0178091	0.142473	Activated	http://www.genome.jp/dbget-bin/show_pathway?hsa04350+4052+8454+9978+4089+4087+4088+92+93+130399+4091+4092+5308+6667+1030+4609+1874+1875+5933+3397+3398+3399+3400+91+3625+3626+83729+10468+10637+6198+6199+5516+5518+5519+6093+387+5594+5595+4086+4090+4093+7048+7046+7042+7043+1634+269+659+657+658+151449+268+353500+650+652+653+654+655+8200+9241+8646
Chronic myeloid leukemia	5220	73	55	0.000292654	-1.87389	0.874	0.00237138	0.0231869	0.208682	Inhibited	http://www.genome.jp/dbget-bin/show_pathway?hsa05220+2122+861+598+5781+7157+7042+7043+3065+1487+4609+7048+7046+6776+6777+4089+4790+5970+4792+572+1029+1026+6654+6655+25759+399694+53358+6464+9846+1398+1399+23624+867+1869+1870+1871+5925+4088+1019+595+207+208+23533+5290+5291+5293+5294+5295+5296+8503+5594+5595+5604+5605+673+3265
Basal cell carcinoma	5217	55	36	0.0802933	-45.7909	0.006	0.00416147	0.0358992	0.36621	Inhibited	http://www.genome.jp/dbget-bin/show_pathway?hsa05217+650+652+7157+51384+7472+7473+7475+7476+7479+7480+7482+7484+80326+81029+89780+10297+8312+1855+1856+11211+2535+7855+7976+8321+8324+8325+2736+2737+27148+6608+64399+1499+51176+6932+6934+83439
Regulation of actin cytoskeleton	4810	213	135	0.00911342	-43.4219	0.068	0.00519707	0.0358992	0.457342	Inhibited	http://www.genome.jp/dbget-bin/show_pathway?hsa04810+2147+10093+10094+10109+81873+375189+8936+55845+10297+50649+10152+10787+3071+26999+10458+54434+54961+1072+1073+3985+2934+85477+7414+23396+8395+1729+81+87+88+89+4478+5962+5829+6548+4659+4660+54776+5499+5501+10398+4636+340156+4638+85366+91807+28964+55740+81624+6093+9475+10298+5058+5063+57144+9459+998+5881+387+23365+9138+128239+8826+2909+10451+7074…
ErbB signaling pathway	4012	87	60	0.00597814	-38.9103	0.107	0.00534409	0.0358992	0.47028	Inhibited	http://www.genome.jp/dbget-bin/show_pathway?hsa04012+2066+2065+6776+6777+1956+1978+6198+6199+1026+2475+10298+5058+5063+57144+572+2549+7039+23624+867+10718+9542+5601+1398+1399+6654+6655+25759+399694+53358+6464+5578+5579+815+816+817+818+5336+1839+3084+2069+23533+5290+5291+5293+5294+5295+5296+8503+207+208+145957+4609+374+1950+5594+5595+5604+5605+673+3265
Glioma	5214	65	48	0.00149661	-14.158	0.451	0.00560284	0.0358992	0.49305	Inhibited	http://www.genome.jp/dbget-bin/show_pathway?hsa05214+1950+7039+5154+1956+5156+163688+801+810+815+816+817+818+5578+5579+25759+399694+53358+6464+6654+6655+673+5604+5605+5594+5595+23533+5290+5291+5293+5294+5295+5296+8503+207+208+5728+2475+1029+7157+595+1019+5925+1869+1870+1871+5336+3265+1026
Small cell lung cancer	5222	86	58	0.0137969	-36.059	0.05	0.00571124	0.0358992	0.502589	Inhibited	http://www.genome.jp/dbget-bin/show_pathway?hsa05222+9134+595+3688+3655+3673+3674+3675+6256+6258+5915+7157+207+208+1164+4149+4609+5728+23533+5290+5291+5293+5294+5295+5296+8503+2272+1282+1284+1285+1286+1287+1288+22798+2335+3908+3909+3910+3911+3912+3913+3914+79444+596+5743+4792+598+7186+7188+7189+9618+1869+1870+1871+1019+4790+5970+5925+1030
Oxytocin signaling pathway	4921	157	105	0.00182307	-13.961	0.453	0.00668865	0.0387014	0.588601	Inhibited	http://www.genome.jp/dbget-bin/show_pathway?hsa04921+2776+340156+4638+85366+91807+3708+3709+163688+801+810+107+109+111+112+114+115+5566+5568+5613+23236+5332+5578+5579+3265+5604+5605+5594+5595+123745+255189+283748+5321+29904+1938+57118+57172+814+815+816+817+818+8536+4846+2977+2982+10398+4637+60+71+387+6093+9475+4659+4660+54776+5499+5501+5743+55799+775+776+778+781+782+783+784+785+9254+93589+4881+48…
MAPK signaling pathway	4010	254	152	0.075145	-38.7902	0.013	0.00774781	0.0387014	0.681807	Inhibited	http://www.genome.jp/dbget-bin/show_pathway?hsa04010+5923+5924+1843+1844+1846+1847+1848+1845+5801+9448+123745+255189+283748+5321+3925+4137+4790+4791+5970+9020+5594+5595+5605+5604+673+5921+4763+5578+5579+5906+5908+5566+5568+5613+22808+3265+6237+10235+115727+6654+6655+55970+5156+2260+2263+1956+4914+4915+55799+775+776+778+781+782+783+784+785+8912+9254+93589+5154+2246+2247+2252+2254+2255+2256+2258+22…
Cell cycle	4110	124	85	0.00159717	-28.532	0.641	0.00807177	0.0387014	0.710316	Inhibited	http://www.genome.jp/dbget-bin/show_pathway?hsa04110+1029+4171+4172+4175+4176+23594+23595+4998+5001+10393+29882+29945+51433+51529+8881+996+8454+9978+983+701+5347+545+10926+10459+4085+699+9184+8555+8556+10971+7529+7531+7532+7533+2810+1111+11200+1026+9088+7465+10744+9232+9700+27127+8243+5925+10912+1647+7157+1028+1030+7042+7043+4089+4087+4088+991+995+8318+990+993+891+9133+890+1022+1019+902+9134+595+…
MicroRNAs in cancer	5206	149	97	0.00871746	0	NA	0.00871746	0.0387014	0.767136	Inhibited	http://www.genome.jp/dbget-bin/show_pathway?hsa05206+993+995+7422+1398+1399+1788+1789+8091+5728+6935+8626+6768+7168+11186+3925+4233+54541+3236+10298+4318+595+894+9134+9759+27086+1956+7042+7078+2475+10253+596+5268+9839+2065+1591+57521+6541+900+4609+3265+10297+3667+5296+5598+5290+1871+3190+4851+4855+648+4325+8434+1869+6093+1870+7431+5581+659+3065+2146+27165+2744+7473+89780+113130+9493+1026+23414+36…
cAMP signaling pathway	4024	200	132	0.00115334	-0.543211	0.975	0.00876036	0.0387014	0.770912	Inhibited	http://www.genome.jp/dbget-bin/show_pathway?hsa04024+775+776+778+488+7137+476+477+480+481+482+483+6548+1129+154+1813+1909+2867+3351+3352+3354+338442+4886+5733+6751+6752+6755+8843+2771+107+109+111+112+114+115+5566+5568+5613+23533+5290+5291+5293+5294+5295+5296+8503+207+208+5594+5595+5350+1080+163688+801+810+11069+491+492+493+5906+5908+5604+5605+64411+673+51196+5601+148327+90993+1258+387+6093+9475+4…
Rap1 signaling pathway	4015	211	130	0.0342341	-74.8557	0.033	0.00879578	0.0387014	0.774029	Inhibited	http://www.genome.jp/dbget-bin/show_pathway?hsa04015+5594+5595+5604+5605+5906+5908+1435+1943+1944+1945+1946+1950+2246+2247+2252+2254+2255+2256+2258+2259+2277+27006+284+4254+4803+51378+5154+5228+56034+7422+80310+8074+8817+8822+9965+1956+1969+2260+2263+2324+3791+3815+4233+4804+5156+7010+5881+83593+5606+5608+1432+5600+5603+6300+375189+60+71+9732+11069+5909+5898+673+3688+135+136+1902+2149+57121+9170+…
Renal cell carcinoma	5211	66	48	0.0025608	-3.57835	0.678	0.0127717	0.0535197	1	Inhibited	http://www.genome.jp/dbget-bin/show_pathway?hsa05211+5781+7042+7043+7422+6513+405+8453+9978+6923+6921+7428+112399+54583+2034+3091+7039+2271+1398+1399+2889+6654+6655+4233+2549+10298+5058+5063+57144+5906+5908+998+2113+207+208+23533+5290+5291+5293+5294+5295+5296+8503+5594+5595+5604+5605+673+3265
Melanoma	5218	71	49	0.0120936	-31.5281	0.236	0.0195762	0.0772653	1	Inhibited	http://www.genome.jp/dbget-bin/show_pathway?hsa05218+673+7157+1019+595+4286+5728+1956+2260+4233+5156+1950+2246+2247+2252+2254+2255+2256+2258+2259+27006+5154+56034+80310+8074+8817+8822+9965+572+1029+1026+1869+1870+1871+5925+207+208+23533+5290+5291+5293+5294+5295+5296+8503+5594+5595+5604+5605+3265
Non-small cell lung cancer	5223	56	41	0.00423692	-7.16568	0.706	0.0203767	0.0772653	1	Inhibited	http://www.genome.jp/dbget-bin/show_pathway?hsa05223+5578+5579+572+207+208+23533+5290+5291+5293+5294+5295+5296+8503+1019+595+1869+1870+1871+3265+7157+5336+7039+1956+6789+1950+5925+5915+6654+6655+6256+6258+11186+83593+1029+2272+5594+5595+5604+5605+673+27436
Sphingolipid signaling pathway	4071	120	81	0.00393845	-4.95253	0.79	0.0210724	0.0772653	1	Inhibited	http://www.genome.jp/dbget-bin/show_pathway?hsa04071+5594+5595+5604+5605+207+208+23533+5290+5291+5293+5294+5295+5296+8503+5578+5579+1901+9294+1903+53637+2771+2776+10672+3265+23236+5332+387+6093+9475+5728+10558+55304+10715+204219+29956+79603+8560+8439+6610+125981+56848+8877+4363+5590+28227+5516+5518+5519+5521+5523+5525+5526+5527+5529+55844+6609+130367+5601+637+1432+5600+5603+6300+581+7157+596+8879…
PI3K-Akt signaling pathway	4151	344	191	0.473178	-83.3015	0.009	0.0275055	0.0959516	1	Inhibited	http://www.genome.jp/dbget-bin/show_pathway?hsa04151+9470+1978+6194+1975+6198+6199+57521+2475+64223+207+208+5290+5291+5293+5295+5296+8503+5728+3667+1956+1969+2260+2263+2324+3791+3815+4233+4804+5156+7010+10161+1129+1902+2149+57121+9170+4609+5934+572+598+7157+2997+595+4790+5970+10971+7529+7531+7532+7533+1435+1943+1944+1945+1946+1950+2246+2247+2252+2254+2255+2256+2258+2259+2277+27006+284+4254+4803+5…
Gap junction	4540	89	60	0.0125389	-15.136	0.352	0.0283493	0.0959516	1	Inhibited	http://www.genome.jp/dbget-bin/show_pathway?hsa04540+1453+5578+5579+2771+2697+57369+5598+10746+5592+5593+3356+983+1902+5566+5568+5613+10381+10382+10383+203068+7280+81027+84617+107+109+111+112+114+115+112714+7277+7278+7846+79861+84790+2977+2982+5594+5595+5604+5605+3265+6654+6655+1956+5156+1950+5154+56034+80310+153+2767+2776+2911+1813+23236+5332+1812+3708+3709
VEGF signaling pathway	4370	60	43	0.00654846	0.938913	0.937	0.0373897	0.119035	1	Activated	http://www.genome.jp/dbget-bin/show_pathway?hsa04370+998+3791+5336+56848+8877+5743+123745+255189+283748+5321+3315+7867+5530+5532+5535+207+208+23533+5290+5291+5293+5294+5295+5296+8503+4773+5578+5579+1432+5600+5603+6300+5829+25759+7422+5594+5595+5604+5605+3265+4846+572+5881
Acute myeloid leukemia	5221	57	41	0.00708906	-1.12004	0.879	0.0378748	0.119035	1	Inhibited	http://www.genome.jp/dbget-bin/show_pathway?hsa05221+5914+2322+1050+861+862+5467+4609+4790+5970+6776+6777+3728+595+51176+6932+6934+83439+3265+572+6198+6199+6654+6655+3815+2475+1978+207+208+23533+5290+5291+5293+5294+5295+5296+8503+5594+5595+5604+5605+673
Fanconi anemia pathway	3460	52	36	0.0274374	3.02789	0.272	0.0440152	0.130044	1	Activated	http://www.genome.jp/dbget-bin/show_pathway?hsa03460+57697+2175+2176+2177+55215+2188+2189+55120+80233+641+80010+7156+8940+84126+545+29935+6117+6119+9894+5889+7398+57599+29089+51455+201254+5429+51426+5980+5395+146956+197342+2072+2067+84464+5888+353497
Fc gamma R-mediated phagocytosis	4666	91	60	0.0241282	-14.8268	0.312	0.0443333	0.130044	1	Inhibited	http://www.genome.jp/dbget-bin/show_pathway?hsa04666+6850+23533+5290+5291+5293+5294+5295+5296+8503+3635+3636+27040+5336+5581+5604+5594+5595+123745+255189+283748+5321+207+208+6198+6199+10451+7409+7410+10810+8936+10093+10094+10109+81873+998+1398+1399+5337+5058+3985+1072+1073+50807+8398+65108+4651+2934+85477+23396+8395+8611+8613+9846+382+1785+273+56848+8877+5578+5579
Prostate cancer	5215	89	59	0.0216671	-16.7346	0.367	0.0463938	0.131699	1	Inhibited	http://www.genome.jp/dbget-bin/show_pathway?hsa05215+6716+4790+5970+4792+5728+4824+354+596+595+51176+6932+6934+83439+1026+2308+1499+1869+1870+1871+3265+7157+1956+2260+2263+3645+5156+572+148327+468+90993+9134+1950+5154+56034+7039+80310+5925+6654+6655+3320+3326+7184+2475+207+208+23533+5290+5291+5293+5294+5295+5296+8503+2950+5594+5595+5604+5605+673
GnRH signaling pathway	4912	91	59	0.0392902	-28.998	0.216	0.0489619	0.134645	1	Inhibited	http://www.genome.jp/dbget-bin/show_pathway?hsa04912+5578+5579+107+109+111+112+114+115+3972+23236+5332+998+468+815+816+817+818+5606+5608+1432+5600+5603+6300+10746+4214+4215+5598+123745+255189+283748+5321+3708+3709+163688+801+810+2767+2776+4323+5337+2796+4313+5566+5568+5613+775+776+778+5594+5595+2488+5604+5605+3265+6654+6655+1956+1839+5601
Thyroid cancer	5216	29	22	0.0180319	2.77692	0.641	0.063113	0.168301	1	Activated	http://www.genome.jp/dbget-bin/show_pathway?hsa05216+3265+5468+673+5594+5595+5604+5605+7849+7157+6256+6258+1499+4609+595+5979+8030+8031+4914+51176+6932+6934+83439
Transcriptional misregulation in cancer	5202	175	110	0.0237716	0.277164	0.516	0.0662484	0.171466	1	Activated	http://www.genome.jp/dbget-bin/show_pathway?hsa05202+2130+2078+2118+54738+466+8013+2521+2308+6757+79058+7030+4609+3398+64083+5154+8938+7102+5468+4233+26471+1026+3486+7048+1051+3569+3576+7849+5546+7113+2119+5328+4318+6935+7850+6692+6256+6258+861+862+5914+3728+1050+8864+5966+598+958+6929+5087+2120+51384+9611+25942+4297+4005+860+3205+3206+5090+4086+4208+7404+8091+8464+8842+2322+4094+894+5079+4613+41…
Thyroid hormone synthesis	4918	72	42	0.339407	-16.4066	0.04	0.0719465	0.180894	1	Inhibited	http://www.genome.jp/dbget-bin/show_pathway?hsa04918+5566+5568+5613+7253+2776+23236+5332+107+109+111+112+114+115+7038+6528+476+477+480+481+482+483+50506+5578+5579+7849+1386+148327+468+90993+405753+3708+3709+7184+9601+4036+257202+2876+2877+2878+2882+493869+2936
Platelet activation	4611	129	81	0.0485588	-34.6571	0.319	0.0800466	0.19567	1	Inhibited	http://www.genome.jp/dbget-bin/show_pathway?hsa04611+3708+3709+2149+6915+23236+5332+3673+3688+2814+5336+10235+5906+5908+7094+3674+3690+23533+5290+5291+5293+5294+5295+5296+8503+207+208+4846+2977+2982+5592+5593+1432+5600+5603+6300+5594+5595+2776+10672+23365+9138+387+6093+9475+4659+5499+5501+340156+4638+85366+91807+64805+2771+107+109+111+112+114+115+5739+123745+255189+283748+5321+5742+5566+5568+5613…
Sulfur relay system	4122	10	8	0.101675	3.21645	0.173	0.0886602	0.210867	1	Activated	http://www.genome.jp/dbget-bin/show_pathway?hsa04122+81605+9054+348180+90353+4357+7263+55687+4337
ECM-receptor interaction	4512	86	57	0.0238787	-2.1118	0.773	0.0921479	0.213395	1	Inhibited	http://www.genome.jp/dbget-bin/show_pathway?hsa04512+22798+3908+3909+3910+3911+3912+3913+3914+1277+1280+1282+1284+1285+1286+1287+1288+1291+1292+1293+1301+1302+131873+85301+3371+63923+2814+7448+2335+1311+7058+7059+7060+3690+3688+3655+3161+961+22987+9899+9900+6382+6385+3339+3691+3696+3694+3674+3680+8516+3679+3678+3675+3672+1101+5649+3673+375790
Pancreatic cancer	5212	66	45	0.02156	-0.576177	0.953	0.100372	0.223151	1	Inhibited	http://www.genome.jp/dbget-bin/show_pathway?hsa05212+23533+5290+5291+5293+5294+5295+5296+8503+9459+207+208+5881+4790+5970+572+598+673+5604+5594+5595+5898+5337+5601+7039+1950+3716+7422+1029+998+1019+5925+1869+1870+1871+7042+7043+7046+7048+4087+4088+4089+7157+5888+1956+595
Progesterone-mediated oocyte maturation	4914	88	57	0.0432852	5.48861	0.481	0.101432	0.223151	1	Activated	http://www.genome.jp/dbget-bin/show_pathway?hsa04914+132864+64506+80315+107+109+111+112+114+115+983+207+208+5140+10393+29882+29945+51433+51529+8881+996+10459+4085+8379+699+993+995+5347+891+9133+3320+3326+5566+5568+5613+9088+6195+5594+5595+5604+2771+890+245711+1432+5600+5601+5603+6300+5241+23533+5290+5291+5293+5294+5295+5296+8503+673
Estrogen signaling pathway	4915	100	64	0.046156	-18.909	0.498	0.109708	0.231116	1	Inhibited	http://www.genome.jp/dbget-bin/show_pathway?hsa04915+2852+4313+4318+1839+1956+2353+6667+5566+5568+5613+3265+5604+5605+5594+5595+1386+148327+468+90993+2776+23236+5332+107+109+111+112+114+115+3760+3762+23533+5290+5291+5293+5294+5295+5296+8503+207+208+4846+25759+399694+53358+6464+6654+6655+3320+3326+7184+2288+3303+3304+3305+3306+3310+2771+2775+3708+3709+163688+801+810+2911
Bladder cancer	5219	38	26	0.0682718	7.64804	0.339	0.110305	0.231116	1	Activated	http://www.genome.jp/dbget-bin/show_pathway?hsa05219+3265+4312+4313+4318+7422+3576+1956+1029+1026+4609+11186+1612+7157+1869+1870+1871+5925+1019+595+9252+1950+5594+5595+5604+5605+673
Colorectal cancer	5210	62	42	0.0300758	-0.991323	0.877	0.122262	0.250211	1	Inhibited	http://www.genome.jp/dbget-bin/show_pathway?hsa05210+1630+7042+7043+23533+5290+5291+5293+5294+5295+5296+8503+26060+10297+4087+4088+7046+4089+4436+673+5601+8312+387+5881+332+4609+595+5604+5594+5595+2353+596+7157+51176+6932+6934+83439+1499+207+208+572+581+7048
Insulin secretion	4911	86	52	0.190703	10.591	0.154	0.132975	0.265949	1	Activated	http://www.genome.jp/dbget-bin/show_pathway?hsa04911+6513+3767+775+776+778+2740+23236+5332+107+109+111+112+114+115+5566+5568+5613+2767+2776+2645+5578+5579+1386+148327+468+90993+815+816+817+818+54795+476+477+480+481+482+483+11069+6833+6616+886+117+3651+5864+10242+157855+27094+27345+3778+3779+3781+3782
Thyroid hormone signaling pathway	4919	119	74	0.0734973	-9.90497	0.431	0.141032	0.275797	1	Inhibited	http://www.genome.jp/dbget-bin/show_pathway?hsa04919+3690+207+208+23533+5290+5291+5293+5294+5295+5296+8503+5578+5579+1499+113026+23236+51196+5332+5333+5336+84812+3265+5604+5605+7067+2475+2626+1827+3091+4624+488+5350+5566+5568+5613+5594+5595+7157+10231+6513+9882+5208+6548+476+477+480+481+482+483+60+71+1733+1735+6567+6256+6258+9611+25942+3065+8841+2648+8850+10025+23389+29079+9968+572+2308+5214+4851…
RNA degradation	3018	77	44	0.410713	3.96252	0.097	0.168237	0.321844	1	Activated	http://www.genome.jp/dbget-bin/show_pathway?hsa03018+2026+87178+54512+23016+23404+22894+6499+5393+56915+51010+10200+23517+4849+57472+29883+25904+196513+55802+57819+27258+25804+23658+51690+51691+80153+23644+5073+3313+3329+10140+10950+7832+132430+26986+340529+5042+645974+80336+8761+131870+115752+5211+5213+5214
Phosphatidylinositol signaling system	4070	82	51	0.121403	-1.40957	0.339	0.172459	0.322902	1	Inhibited	http://www.genome.jp/dbget-bin/show_pathway?hsa04070+5728+64768+113026+23236+51196+5332+5333+5336+84812+163688+801+810+5578+5579+3708+3709+23533+5290+5291+5293+5294+5295+5296+8503+23396+8395+55361+5289+1040+8760+1608+160851+1609+8526+8527+9162+5286+5287+5288+3633+8867+4534+3612+3613+3628+27124+51763+3706+80271+3635+3636
Endometrial cancer	5213	52	35	0.0513757	2.46341	0.838	0.178468	0.324478	1	Activated	http://www.genome.jp/dbget-bin/show_pathway?hsa05213+1499+3265+7157+10297+8312+1496+29119+572+3611+51176+6932+6934+83439+5728+6654+6655+1956+595+4609+207+208+23533+5290+5291+5293+5294+5295+5296+8503+1950+5594+5595+5604+5605+673
mTOR signaling pathway	4150	60	38	0.12683	-3.85531	0.345	0.180675	0.324478	1	Inhibited	http://www.genome.jp/dbget-bin/show_pathway?hsa04150+51719+6794+673+25989+8408+9470+1978+6194+1975+6198+6199+7422+3091+57521+2475+64223+253260+54541+6195+5594+5595+207+208+23533+5290+5291+5293+5294+5295+5296+8503+5728+84335+10325+10670+5578+5579+3667
Prolactin signaling pathway	4917	72	46	0.0849439	-7.56504	0.732	0.234896	0.408102	1	Inhibited	http://www.genome.jp/dbget-bin/show_pathway?hsa04917+207+208+23533+5290+5291+5293+5294+5295+5296+8503+5594+5595+5604+5605+3265+5618+3717+6776+6777+25759+399694+53358+6464+6654+6655+5601+1432+5600+5603+6300+2592+30837+9021+9306+9655+2001+1154+8600+2645+894+3972+595+2353+8792+4790+5970
HIF-1 signaling pathway	4066	103	65	0.0635247	0.267268	0.988	0.236514	0.408102	1	Activated	http://www.genome.jp/dbget-bin/show_pathway?hsa04066+8453+9978+6923+6921+7422+112399+54583+7428+405+3091+6513+1950+1956+23533+5290+5291+5293+5294+5295+5296+8503+207+208+2475+27035+5336+5578+5579+3939+815+816+817+818+3098+3099+3101+5211+2026+5230+5209+7018+7037+284+51378+7010+4846+4878+4055+4790+5970+3460+3569+3570+1978+9470+6198+6199+6194+5594+5595+5604+5605+2872+596+1026
Choline metabolism in cancer	5231	100	61	0.142257	-7.98853	0.454	0.241532	0.408747	1	Inhibited	http://www.genome.jp/dbget-bin/show_pathway?hsa05231+5601+5594+5595+6654+6655+3265+5604+5605+207+208+23533+5290+5291+5293+5294+5295+5296+8503+1956+5156+1950+5154+56034+80310+204962+23446+60482+6582+80736+56994+5130+9468+10434+123745+255189+283748+5321+56261+5337+2475+6198+6199+1978+1608+160851+1609+8526+8527+9162+23396+8395+5881+10810+8936+8611+8613+6667+2353+3091+5578+5579
Cytokine-cytokine receptor interaction	4060	263	113	0.999976	-18.2041	0.073	0.264058	0.435408	1	Inhibited	http://www.genome.jp/dbget-bin/show_pathway?hsa04060+53833+659+93+91+92+58985+3572+8809+3556+7850+55540+657+658+269+7046+7048+3606+3553+3552+27190+8200+655+650+268+83729+3626+3625+7043+7042+60401+10913+8784+958+355+8771+8764+4055+8741+4050+163702+3460+2322+3815+1956+4233+2324+3791+5156+50604+29949+338376+2323+4254+1435+1950+2277+7422+80301+5154+56034+4352+5618+3566+3559+3568+7066+85480+3595+3953+…
PPAR signaling pathway	3320	69	38	0.557863	-3.51818	0.133	0.267182	0.435408	1	Inhibited	http://www.genome.jp/dbget-bin/show_pathway?hsa03320+364+2710+5346+10998+10999+11001+2167+2170+2171+2173+5465+6256+6258+5467+5468+30+33+1962+1376+126129+1375+2180+2181+2182+23205+23305+4973+4023+10580+4312+51129+8309+3611+79966+9415+1593+7316+4199
Protein processing in endoplasmic reticulum	4141	167	94	0.41898	14.5953	0.187	0.277872	0.444595	1	Activated	http://www.genome.jp/dbget-bin/show_pathway?hsa04141+468+5601+7186+811+23645+2923+823+10952+23480+29927+7415+1650+201595+7991+55741+80267+10484+9632+10960+7353+55666+30001+56605+10905+11253+4121+23193+5589+7841+84447+7326+7095+581+22926+27102+440275+8720+7494+7466+5886+5887+29978+56893+55768+118424+51465+55432+3303+3304+3305+3306+3310+6400+91319+27248+9978+26232+26270+10477+7324+7325+285126+3300+…
Apoptosis	4210	85	52	0.158132	-10.4438	0.516	0.286074	0.449546	1	Inhibited	http://www.genome.jp/dbget-bin/show_pathway?hsa04210+5530+5532+5535+581+598+1676+596+7157+2021+9131+79444+1677+840+572+4790+5970+5566+5568+5573+5577+5613+4792+637+841+823+207+208+9020+23533+5290+5291+5293+5294+5295+5296+8503+11213+3654+3656+51135+8717+7186+4914+3556+8793+8794+8795+355+4803+3552+3553+8743
Wnt signaling pathway	4310	139	83	0.161281	-5.8162	0.593	0.320122	0.494223	1	Inhibited	http://www.genome.jp/dbget-bin/show_pathway?hsa04310+4088+4773+4775+4776+5578+5579+5530+5532+5535+815+816+817+818+23236+5332+11211+2535+7855+7976+8321+8324+8325+81029+5601+5881+9475+387+23500+1855+1856+144165+166336+57216+5467+595+894+896+8061+4609+1487+64321+4089+51176+6932+6934+83439+8607+6885+122011+9978+8454+6907+79718+90665+10297+85407+7157+8312+1499+5566+5568+5613+10023+23401+1460+1454+2294…
Insulin signaling pathway	4910	140	84	0.143972	-9.61055	0.758	0.350879	0.524975	1	Inhibited	http://www.genome.jp/dbget-bin/show_pathway?hsa04910+51763+3636+5601+9021+2872+5594+5595+2194+5564+5565+3991+5499+5501+5507+79660+90673+5313+2997+163688+5256+5261+801+810+5566+5568+5573+5577+5613+31+32+1978+6194+5834+5836+5837+2308+57521+6654+6655+3265+9470+5604+5605+25759+399694+53358+6464+9322+6198+6199+572+673+2475+5140+2203+8789+23265+10891+10580+207+208+23533+5290+5291+5293+5294+5295+5296+85…
Viral carcinogenesis	5203	203	119	0.180008	-0.622046	0.609	0.351972	0.524975	1	Inhibited	http://www.genome.jp/dbget-bin/show_pathway?hsa05203+7157+1739+23513+5829+3661+5925+5933+5934+9519+5700+1108+841+581+572+7186+7188+5594+5595+1386+148327+468+90993+3716+6776+6777+23533+5290+5291+5293+5294+5295+5296+8503+4790+4791+5966+5970+1019+1029+1030+5423+8379+5902+2648+8850+6722+8717+6850+7874+3516+595+894+896+890+9134+1232+3249+3265+10971+7529+7531+7532+7533+2965+2967+27044+245972+9093+1026+…
Complement and coagulation cascades	4610	68	33	0.890239	26.4253	0.128	0.36145	0.530127	1	Activated	http://www.genome.jp/dbget-bin/show_pathway?hsa04610+2161+2162+2147+2153+2159+2155+7056+2149+2244+5627+5624+5104+7035+2157+3827+1361+5265+5345+5328+624+1675+3075+735+966+733+730+727+710+716+720+717+5648+1604
B cell receptor signaling pathway	4662	72	44	0.186292	-5.63228	0.643	0.373977	0.539508	1	Inhibited	http://www.genome.jp/dbget-bin/show_pathway?hsa04662+4792+4793+4794+4790+5970+10892+8915+84433+207+208+5579+10451+7409+7410+23533+5290+5291+5293+5294+5295+5296+8503+975+3635+3636+2353+3265+4773+4775+5530+5532+5535+5881+5336+6850+11025+5604+5605+5594+5595+6654+6655+118788+27071
RNA transport	3013	165	95	0.29563	1.39192	0.434	0.391756	0.549209	1	Activated	http://www.genome.jp/dbget-bin/show_pathway?hsa03013+11260+5901+22916+51808+1207+8487+50628+79760+54960+96764+79833+3837+10073+4116+9775+10921+10284+10482+56000+5411+10189+23636+9972+9688+79023+6396+23279+79902+81929+348995+55746+23225+100101267+94026+9883+7329+5905+6613+11097+8086+10419+57510+1917+5976+7919+84305+10289+728689+8662+8664+8665+8666+8667+8668+8669+51095+10248+10557+10799+10940+11102…
AMPK signaling pathway	4152	123	72	0.256319	4.68772	0.511	0.397223	0.549209	1	Activated	http://www.genome.jp/dbget-bin/show_pathway?hsa04152+5564+5565+207+208+23533+5290+5291+5293+5294+5295+5296+8503+3667+2308+6517+6794+10891+51094+79602+10645+31+126129+1375+5207+5208+5209+5210+5211+5213+5214+2203+8789+2475+57521+84335+2997+6720+2194+32+79966+29904+1938+6198+6199+1978+5468+23216+55437+51719+28227+5516+5518+5519+5521+5523+5525+5526+5527+5529+55844+1994+595+890+3991+148+3953+1080+5155…
Ovarian steroidogenesis	4913	50	26	0.725629	6.22834	0.182	0.399425	0.549209	1	Activated	http://www.genome.jp/dbget-bin/show_pathway?hsa04913+3294+3972+6770+1583+107+109+111+112+114+115+2488+1588+3292+5566+5568+5613+3949+1573+5743+123745+255189+283748+5321+2661+654+949
Fc epsilon RI signaling pathway	4664	69	43	0.141932	-0.831701	0.966	0.409536	0.554448	1	Inhibited	http://www.genome.jp/dbget-bin/show_pathway?hsa04664+2206+2205+2534+207+208+1432+5600+5603+6300+5606+5608+23533+5290+5291+5293+5294+5295+5296+8503+5578+5579+5581+9846+6850+27040+5336+3635+5594+5595+5604+5605+3265+6654+6655+123745+255189+283748+5321+5601+5881+10451+7409+7410
p53 signaling pathway	4115	68	41	0.234986	1.44689	0.769	0.48987	0.650018	1	Activated	http://www.genome.jp/dbget-bin/show_pathway?hsa04115+3486+10912+1647+1111+545+11200+56475+2810+9134+8493+7161+900+901+6241+1643+55240+5728+5268+3732+1029+1026+64393+637+9538+355+51512+581+55367+8795+841+983+7157+1019+595+894+896+64065+891+9133+63970+27113
Leukocyte transendothelial migration	4670	116	66	0.392432	-12.9017	0.468	0.4949	0.650018	1	Inhibited	http://www.genome.jp/dbget-bin/show_pathway?hsa04670+10686+1365+1366+149461+23562+24146+5010+644672+9073+9075+9076+4313+4318+5781+50848+3688+58494+23533+5290+5291+5293+5294+5295+5296+8503+1499+60+71+10398+4636+6093+9475+5578+5579+387+83700+1432+5600+5603+6300+2909+394+1496+29119+27035+1535+5829+5906+5908+10451+7409+7410+4478+11069+83593+6387+2771+3383+5336+998+399+7414+81+87+88+89
Hedgehog signaling pathway	4340	51	30	0.353407	4.83906	0.562	0.519653	0.672492	1	Activated	http://www.genome.jp/dbget-bin/show_pathway?hsa04340+650+652+51384+7472+7473+7475+7476+7479+7480+7482+7484+80326+81029+89780+7546+122011+1453+1454+1455+5566+5568+5613+2736+2737+27148+51715+4036+6608+2619+64399
Tight junction	4530	136	78	0.33768	-2.20123	0.757	0.604307	0.77071	1	Inhibited	http://www.genome.jp/dbget-bin/show_pathway?hsa04530+50848+58494+83700+5578+5579+5581+5583+5588+5516+5518+5519+10686+1365+1366+149461+23562+24146+5010+644672+9073+9075+9076+50855+84552+84612+3993+3996+56288+2035+2036+2037+23136+1496+29119+8777+2017+9218+1460+5865+60+71+6709+10398+22989+4620+4624+4629+4636+8735+1019+387+55870+5590+22808+3265+6237+207+208+2771+51776+1499+27134+998+5521+55844+81+87+…
TNF signaling pathway	4668	110	63	0.366816	1.76347	0.819	0.6617	0.831851	1	Activated	http://www.genome.jp/dbget-bin/show_pathway?hsa04668+8717+7186+7188+6885+5606+5608+1432+5600+5603+6300+5601+4792+4790+5970+1326+5604+5594+5595+8986+9252+1386+148327+468+90993+1051+841+840+2919+3627+6376+1435+355+8809+3553+3569+9021+7128+2353+4318+4323+64127+3383+6401+5743+23533+5290+5291+5293+5294+5295+5296+8503+207+208+9020+11035+9530+197259+192111+10059+257397+83737+9863
NOD-like receptor signaling pathway	4621	57	32	0.497668	-2.51083	0.694	0.712558	0.879917	1	Inhibited	http://www.genome.jp/dbget-bin/show_pathway?hsa04621+64127+8767+4792+4793+4790+5970+6885+257397+3576+2919+22861+114548+29108+834+3553+3606+7205+841+3320+3326+7184+3569+5601+5594+5595+1432+5600+5603+6300+84674+7128+7189
Chemokine signaling pathway	4062	187	99	0.757236	-17.0008	0.466	0.720441	0.879917	1	Inhibited	http://www.genome.jp/dbget-bin/show_pathway?hsa04062+10803+1232+1524+2829+3577+3579+10563+2919+3576+3627+4283+5197+56477+6356+6358+6361+6362+6366+6367+6370+6372+6373+6376+6387+9547+3717+5829+387+23533+5290+5291+5293+5294+5295+5296+8503+23236+5332+25759+399694+53358+6464+2771+10681+2782+2783+2787+2788+2791+51764+54331+55970+9844+1398+1399+156+2868+2869+2870+409+6093+9475+10451+7409+7410+998+107+10…
Toll-like receptor signaling pathway	4620	104	50	0.940514	-14.0002	0.385	0.729931	0.879917	1	Inhibited	http://www.genome.jp/dbget-bin/show_pathway?hsa04620+7189+3654+51135+5594+5595+1326+4790+3665+3663+6373+3627+958+6885+1432+5600+5603+6300+3576+5601+3553+9641+3569+207+208+4792+3661+7097+7100+7098+7096+353376+54472+841+4283+23533+5290+5291+5293+5294+5295+5296+8503+5970+5606+5608+5604+5605+2353+3592+3593
FoxO signaling pathway	4068	131	73	0.487457	-2.624	0.849	0.778971	0.926344	1	Inhibited	http://www.genome.jp/dbget-bin/show_pathway?hsa04068+5601+5594+5595+5564+5565+2308+4303+6654+6655+3265+5604+5605+673+207+208+23533+5290+5291+5293+5294+5295+5296+8503+3667+1956+6789+1950+5728+891+9133+595+894+1030+1026+5934+10769+1263+5347+10912+1647+8743+604+847+1901+5896+2911+9454+9455+116986+1454+664+23710+9140+6446+7046+7048+4087+4088+4089+2290+3569+1432+5600+5603+6300+7874+114907+26260+6517+6…
Neuroactive ligand-receptor interaction	4080	273	146	0.73757	-1.93835	0.592	0.798462	0.929133	1	Inhibited	http://www.genome.jp/dbget-bin/show_pathway?hsa04080+1511+2147+5644+4142+2847+3972+2488+6865+84634+5618+3953+7067+2908+706+7442+116443+116444+2890+2891+2892+2894+2898+2899+2901+2902+2903+2904+22953+5023+5025+5026+5027+9127+2556+2561+2562+2563+2564+2565+2567+2568+55879+165829+2911+2912+2913+2914+7434+6344+117+5745+2692+2740+2696+1394+1395+10203+799+10800+57105+59350+1901+1903+53637+9294+1902+9170+…
Regulation of autophagy	4140	38	11	0.999711	-3.5762	0.453	0.81161	0.929133	1	Inhibited	http://www.genome.jp/dbget-bin/show_pathway?hsa04140+10533+115201+23192+84971+23710+9474+9140+22863+25989+8408+5289
Adipocytokine signaling pathway	4920	70	39	0.514696	0.793078	0.897	0.818506	0.929133	1	Activated	http://www.genome.jp/dbget-bin/show_pathway?hsa04920+4790+5970+4792+4793+4794+5781+9021+126129+1375+2180+2181+2182+23205+23305+5443+5564+5565+32+5465+51094+79602+5588+3953+10645+6794+4852+6256+6258+6513+6517+5601+207+208+2475+7186+3667+10891+8717+3717
Notch signaling pathway	4330	48	22	0.926223	6.97572	0.513	0.828723	0.929133	1	Activated	http://www.genome.jp/dbget-bin/show_pathway?hsa04330+3065+1487+388585+3516+2648+8850+55534+84441+6868+151636+1840+23220+8650+9253+3714+4851+4855+1855+1856+3955+5986+10683
Antigen processing and presentation	4612	69	28	0.994774	1.7446	0.485	0.834108	0.929133	1	Activated	http://www.genome.jp/dbget-bin/show_pathway?hsa04612+3109+4800+4801+8625+1508+5641+10437+3804+3812+3821+3822+3824+6892+811+2923+3133+3111+6890+6891+3320+3326+3303+3304+3305+3306+3310+5720+5721
Jak-STAT signaling pathway	4630	155	62	0.99995	-4.63823	0.501	0.847248	0.931973	1	Inhibited	http://www.genome.jp/dbget-bin/show_pathway?hsa04630+10252+10253+161742+200734+598+595+894+896+4609+207+208+23533+5290+5291+5293+5294+5295+5296+8503+6654+6655+5781+1154+30837+9021+9655+6773+6776+6777+6778+51588+8554+23624+867+3716+3717+7297+1271+163702+3460+3559+3566+3568+3570+3572+3595+3953+4352+53833+5618+58985+1489+23529+3569+3589+3592+3593+85480+29949+338376+50604+7066
NF-kappa B signaling pathway	4064	90	43	0.935903	-6.27694	0.557	0.860889	0.932278	1	Inhibited	http://www.genome.jp/dbget-bin/show_pathway?hsa04064+598+596+4792+3654+51135+7186+7188+8717+3553+4055+9020+4791+4790+5970+6885+958+5579+5588+84433+8915+10892+7189+7128+3576+6387+8792+8600+257397+353376+7535+27040+1460+5328+5336+6850+51588+7329+55367+5743+6366+3383+4050+23085
Glucagon signaling pathway	4922	102	54	0.712457	2.55953	0.772	0.87882	0.932278	1	Activated	http://www.genome.jp/dbget-bin/show_pathway?hsa04922+6513+5315+2645+5211+441531+5223+5566+5568+5613+2997+5834+5836+5837+2776+23236+5332+1386+148327+468+90993+5531+55671+10891+2308+150094+207+208+5140+126129+1375+5256+5261+163688+801+810+5530+5532+5535+2203+5207+31+32+5564+5565+815+816+817+818+3708+3709+160287+3939+3945+5465
T cell receptor signaling pathway	4660	104	57	0.571997	-0.590939	0.963	0.879308	0.932278	1	Inhibited	http://www.genome.jp/dbget-bin/show_pathway?hsa04660+1019+4792+4793+4794+4790+5970+9020+1326+207+208+10892+8915+84433+5588+23533+5290+5291+5293+5294+5295+5296+8503+6654+6655+3265+2353+4773+4775+5530+5532+5535+27040+10451+7409+7410+387+998+10298+5058+5063+57144+7535+2534+23624+867+1493+5604+5605+5594+5595+6885+5601+1739+1432+5600+5603+6300
Cytosolic DNA-sensing pathway	4623	61	30	0.858682	0.766413	0.753	0.92853	0.972746	1	Activated	http://www.genome.jp/dbget-bin/show_pathway?hsa04623+834+29108+3553+3606+81030+9641+3661+3665+3627+57506+340061+4790+5970+11035+3569+90865+4792+4793+10623+171568+51082+51728+5435+5437+5441+55718+84265+9533+11277+115004
Natural killer cell mediated cytotoxicity	4650	125	59	0.970512	-10.9057	0.741	0.956243	0.986581	1	Inhibited	http://www.genome.jp/dbget-bin/show_pathway?hsa04650+4773+5530+5532+5535+2534+8743+3460+5336+27040+3133+5578+5579+6850+7535+117157+4068+5781+637+355+8793+8794+8795+80328+80329+3383+23533+5290+5291+5293+5294+5295+5296+8503+5594+5595+5604+5605+673+3265+6654+6655+25759+399694+53358+6464+5058+5881+10451+7409+7410+3824+51744+2215+3822+3821+3804+3812+135250+353091
RIG-I-like receptor signaling pathway	4622	69	34	0.866705	-0.887411	0.859	0.964159	0.986581	1	Inhibited	http://www.genome.jp/dbget-bin/show_pathway?hsa04622+57506+4790+5970+55593+3661+9641+3665+10010+841+7189+4792+4793+9636+9474+9140+340061+1540+5300+8717+26007+1654+4214+5601+1432+5600+5603+6300+7186+6885+338376+3576+3592+3593+3627
SNARE interactions in vesicular transport	4130	34	16	0.870002	-0.160638	0.943	0.982811	0.994108	1	Inhibited	http://www.genome.jp/dbget-bin/show_pathway?hsa04130+662+55850+53407+10652+6811+9342+10228+8677+415117+10490+143187+8417+8674+10791+2054+9341
Intestinal immune network for IgA production	4672	45	13	0.999903	0.180438	0.922	0.996868	0.996868	1	Activated	http://www.genome.jp/dbget-bin/show_pathway?hsa04672+3569+8741+958+3109+3111+10803+56477+8174+6387+6370+4055+9020+23308
